# Supplementary material for: 2,2′-Ethylenebis(1,3-dithiane) as a polydentate μ2-, μ4- and μ5-assembling ligand for the construction of sulphur-rich Cu(i), Hg(ii) and heterometallic Cu(i)/Hg(ii) coordination polymers featuring uncommon network architectures
Source: Royal Society of Chemistry journal article supplement (doi:10.1039/d2dt00800a), 2022-01-01
Supplement: d2dt00800a1.pdf [file d2dt00800a1.pdf]

# 2,2'-Ethylenebis(1,3-dithiane) as polydentate $\mu_2$ -, $\mu_4$ - and $\mu_5$ -assembling ligand for the construction of sulphur-rich Cu(I), Hg(II) and heterometallic Cu(I)/Hg(II) coordination polymers featuring uncommon network architectures

Lydie Viau,<sup>\*,[a]</sup> Michael Knorr,<sup>\*,[a]</sup> Lena Knauer,<sup>[b]</sup> Lukas Brieger,<sup>[b]</sup> and Carsten Strohmann<sup>\*,[b]</sup>

---

## Table of contents

---

|                                                                                                                                                                                                                       |    |
|-----------------------------------------------------------------------------------------------------------------------------------------------------------------------------------------------------------------------|----|
| <b>Figure S1.</b> View down the <i>b</i> axis of three layers of the 2D network of $[\{\text{Cu}(\mu_2\text{-I})_2\text{Cu}\}(\mu_2\text{-L1})_2]_n$ <b>CP1</b> . ....                                                | 3  |
| <b>Figure S2.</b> View down the <i>c</i> axis of two layers of the 2D network of $[\{\text{Cu}(\mu_2\text{-I})_2\text{Cu}\}(\mu_4\text{-L1})]_n$ <b>CP2</b> . ....                                                    | 4  |
| <b>Figure S3.</b> View down the <i>a</i> axis of the <i>bc</i> plane of <b>CP3</b> . ....                                                                                                                             | 4  |
| <b>Figure S4.</b> View down the <i>c</i> axis on the <i>ab</i> plane showing two layers of the 2D network of $[\{\text{Cu}(\mu_2\text{-Br})_2(\mu_2\text{-L1})(\mu_4\text{-L1})_{0.5}\}]_n$ ( <b>CP4</b> ). ....      | 5  |
| <b>Figure S5.</b> View down the <i>c</i> axis on the <i>ab</i> plane showing two layers of the 2D network of $[\{\text{Cu}(\mu_2\text{-Br})_2(\mu_4\text{-L1})\}]_n$ <b>CP5</b> . ....                                | 6  |
| <b>Figure S6.</b> A view along the <i>b</i> axis of the crystal packing of <b>CP6</b> . The C—H...Br hydrogen bonds are shown as dashed lines. ....                                                                   | 7  |
| <b>Figure S7.</b> View down the <i>c</i> axis on the <i>ab</i> plane showing two layers of the 2D network of $[\{\text{Cu}(\mu_2\text{-Cl})_2\text{Cu}\}(\mu_4\text{-L1})]_n$ <b>CP7</b> . ....                       | 8  |
| <b>Figure S8.</b> View of the unit cell of <b>CP9</b> containing two parallel running 1D ribbons. ....                                                                                                                | 8  |
| <b>Figure S9.</b> View of the packing of the ribbons of <b>CP10</b> within the unit cell. ....                                                                                                                        | 9  |
| <b>Figure S10.</b> View of the association of parallel running 1D chains of $[(\text{HgBr}_2)(\mu_2\text{-L2})]_n$ ( <b>CP11</b> ) through intermolecular H...Br bonding generating a 3D supramolecular network. .... | 9  |
| <b>Figure S11.</b> Parallel arrangement of the ribbons of <b>CP13</b> in the packing. ....                                                                                                                            | 10 |
| <b>Figure S12.</b> View of the packing of three layers of the 2D network of $[\{\text{Cu}(\text{MeCN})\}(\text{HgI}(\text{Br}_2)(\mu_2\text{-L1})_{1.5})]_n$ ( <b>CP15</b> ). ....                                    | 10 |
| <b>Figure S13.</b> Simulated and experimental PXRD patterns of <b>CP1</b> . ....                                                                                                                                      | 11 |
| <b>Figure S14.</b> Simulated and experimental PXRD patterns of <b>CP2</b> . ....                                                                                                                                      | 11 |
| <b>Figure S15.</b> Simulated and experimental PXRD patterns of <b>CP3</b> . ....                                                                                                                                      | 12 |
| <b>Figure S16.</b> PXRD pattern of <b>CP1</b> before and after heating at 300°C. Arrows and asterisk are assigned to <b>CP3</b> and $\gamma$ -CuI respectively. ....                                                  | 12 |
| <b>Figure S17.</b> PXRD pattern of <b>CP1</b> before and after addition of 1 equivalent CuI. Comparison with the PXRD of <b>CP3</b> . ....                                                                            | 13 |
| <b>Figure S18.</b> Simulated and experimental PXRD patterns of <b>CP4</b> . ....                                                                                                                                      | 13 |
| <b>Figure S19.</b> Simulated and experimental PXRD patterns of <b>CP5</b> . ....                                                                                                                                      | 14 |
| <b>Figure S20.</b> PXRD patterns of <b>CP6</b> before and after exposure to $\text{NEt}_3$ . ....                                                                                                                     | 14 |
| <b>Figure S21.</b> Simulated and experimental PXRD patterns of <b>CP7</b> . ....                                                                                                                                      | 15 |
| <b>Figure S22.</b> Simulated and experimental PXRD patterns of <b>CP8</b> . ....                                                                                                                                      | 15 |
| <b>Figure S23.</b> Simulated and experimental PXRD patterns of <b>CP9</b> . ....                                                                                                                                      | 16 |
| <b>Figure S24.</b> Simulated and experimental PXRD patterns of <b>CP12</b> . ....                                                                                                                                     | 16 |
| <b>Figure S25.</b> Simulated and experimental PXRD patterns of <b>CP13</b> . ....                                                                                                                                     | 17 |

|                                                                                                                                                      |    |
|------------------------------------------------------------------------------------------------------------------------------------------------------|----|
| <b>Figure S26.</b> Experimental PXRD patterns of <b>CP13</b> obtained by addition of 1CuI to <b>CP8</b> and of 1HgI <sub>2</sub> to <b>CP1</b> ..... | 17 |
| <b>Figure S27.</b> Simulated and experimental PXRD patterns of <b>CP14</b> .....                                                                     | 18 |
| <b>Figure S28.</b> Simulated and experimental PXRD patterns of <b>CP15</b> .....                                                                     | 18 |
| <b>Figure S29.</b> ATR-IR spectrum of <b>CP6</b> . ....                                                                                              | 19 |
| <b>Figure S30.</b> IR spectra of <b>CP6</b> before and after exposure to NEt <sub>3</sub> . ....                                                     | 19 |
| <b>Figure S31.</b> ATR-IR spectrum of <b>CP13</b> . ....                                                                                             | 20 |
| <b>Figure S32.</b> ATR-IR spectrum of <b>CP14</b> . ....                                                                                             | 20 |
| <b>Figure S33.</b> ATR-IR spectrum of <b>CP15</b> . ....                                                                                             | 21 |
| <b>Figure S34.</b> TGA traces and its first derivatives of <b>CP1</b> under air flow.....                                                            | 21 |
| <b>Figure S35.</b> TGA traces and its first derivatives of <b>CP2</b> under air flow.....                                                            | 22 |
| <b>Figure S36.</b> TGA traces and its first derivatives of <b>CP3</b> under air flow.....                                                            | 22 |
| <b>Figure S37.</b> TGA traces and its first derivatives of <b>CP4</b> under air flow.....                                                            | 23 |
| <b>Figure S38.</b> TGA traces and its first derivatives of <b>CP5</b> under air flow.....                                                            | 23 |
| <b>Figure S39.</b> TGA traces and its first derivatives of <b>CP6</b> under air flow.....                                                            | 24 |
| <b>Figure S40.</b> TGA traces and its first derivatives of <b>CP7</b> under air flow.....                                                            | 24 |
| <b>Figure S41.</b> Images of <b>CP6</b> before and after exposure to NEt <sub>3</sub> vapor. ....                                                    | 25 |
| <br>                                                                                                                                                 |    |
| <b>Table S1.</b> Crystal Data, Data Collection and Structure Refinement for <b>L1</b> and <b>CP1</b> .....                                           | 26 |
| <b>Table S2.</b> Crystal Data, Data Collection and Structure Refinement for <b>CP2</b> and <b>CP3</b> . ....                                         | 27 |
| <b>Table S3.</b> Crystal Data, Data Collection and Structure Refinement for <b>CP4</b> and <b>CP5</b> . ....                                         | 28 |
| <b>Table S4.</b> Crystal Data, Data Collection and Structure Refinement for <b>CP6</b> at 100K and 200K. ....                                        | 29 |
| <b>Table S5.</b> Crystal Data, Data Collection and Structure Refinement for <b>CP7</b> and <b>CP8</b> . ....                                         | 30 |
| <b>Table S6.</b> Crystal Data, Data Collection and Structure Refinement for <b>CP9</b> and <b>CP10</b> . ....                                        | 31 |
| <b>Table S7.</b> Crystal Data, Data Collection and Structure Refinement for <b>CP11</b> and <b>CP13</b> . ....                                       | 32 |
| <b>Table S8.</b> Crystal Data, Data Collection and Structure Refinement for <b>CP14</b> and <b>CP15</b> . ....                                       | 33 |
| <b>Table S9.</b> Crystal Data, Data Collection and Structure Refinement for <b>D1</b> and <b>M1</b> .....                                            | 34 |
| <b>Table S10.</b> Hydrogen bond geometry (Å, °) in <b>CP6</b> . ....                                                                                 | 35 |
| <b>Table S11.</b> Hydrogen bond geometry (Å, °) in <b>CP11</b> . ....                                                                                | 35 |

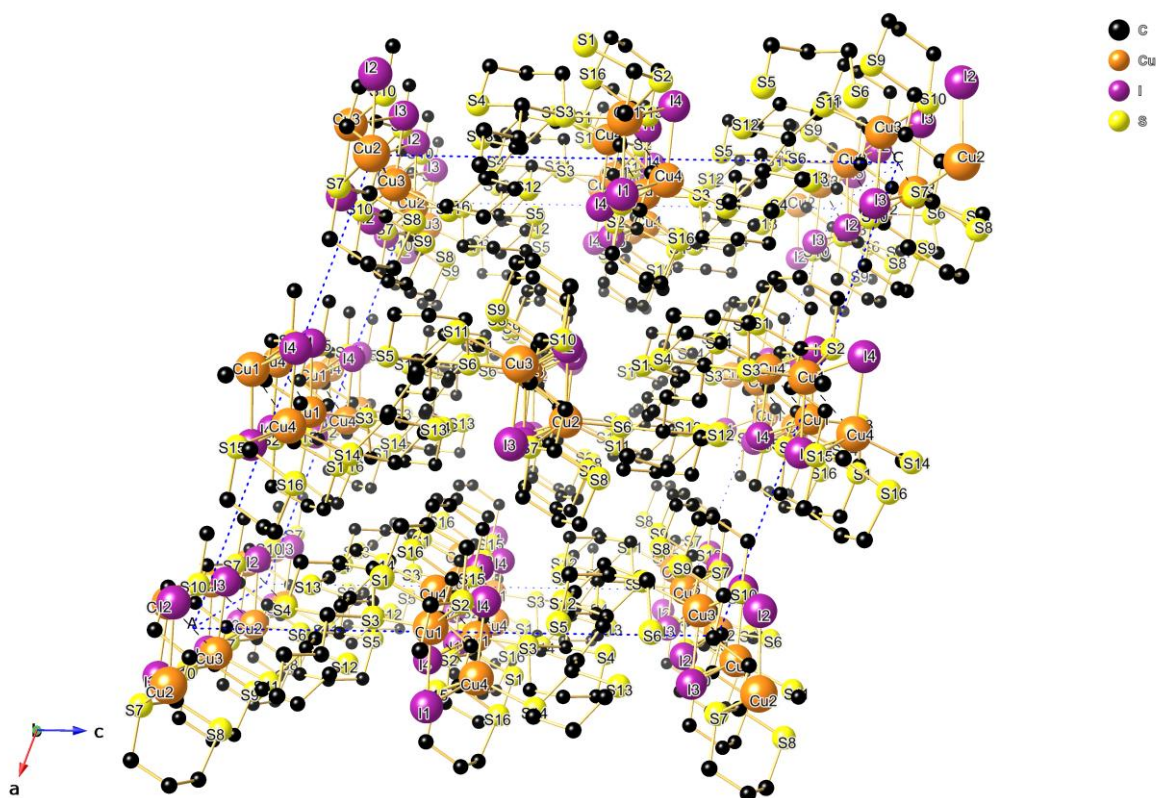

**Figure S1.** View down the *b* axis of three layers of the 2D network of  $[\{\text{Cu}(\mu_2\text{-I})_2\text{Cu}\}(\mu_2\text{-L1})_2]_n$  CP1.

Selected angles ( $^\circ$ ) at 100 K: Cu1A-I1A-Cu4<sup>1</sup> 65.144(10), Cu2-I2A-Cu2<sup>2</sup> 64.360(9), Cu3-I3-Cu3<sup>3</sup> 66.954(9), Cu4-I4-Cu1A<sup>4</sup> 65.427(9), I1A-Cu1A-I4<sup>1</sup> 114.236(11), I1A-Cu1A-Cu4<sup>1</sup> 57.537(7), I4<sup>1</sup>-Cu1A-Cu4<sup>1</sup> 56.950(8), S2-Cu1A-I1A 108.639(15), S2-Cu1A-I4<sup>1</sup> 94.816(15), S2-Cu1A-Cu4<sup>1</sup> 116.447(17), S2-Cu1A-S3 136.45(2), S3-Cu1A-I1A 98.417(17), S3-Cu1A-I4<sup>1</sup> 104.548(16), S3-Cu1A-Cu4<sup>1</sup> 106.776(16), I2A-Cu2-I2A<sup>2</sup> 115.641(9), I2A<sup>2</sup>-Cu2-Cu2<sup>2</sup> 57.281(8), I2A-Cu2-Cu2<sup>2</sup> 58.361(8), S6-Cu2-I2A<sup>2</sup> 97.718(14), S6-Cu2-I2A 99.428(14), S6-Cu2-Cu2<sup>2</sup> 106.242(16), S7-Cu2-I2A 96.568(14), S7-Cu2-I2A<sup>2</sup> 106.490(14), S7-Cu2-Cu2<sup>2</sup> 112.012(16), S7-Cu2-S6 141.460(19), I3-Cu3-I3<sup>3</sup> 113.046(8), I3<sup>3</sup>-Cu3-Cu3<sup>3</sup> 57.325(8), I3-Cu3-Cu3<sup>3</sup> 57.325(8), S10-Cu3-I3<sup>3</sup> 93.476(13), S10-Cu3-I3 108.460(14), S10-Cu3-Cu3<sup>3</sup> 109.864(15), S10-Cu3-S11 121.608(18), S11-Cu3-I3 111.015(14), S11-Cu3-I3<sup>3</sup> 108.138(14), S11-Cu3-Cu3<sup>3</sup> 127.358(17), I1A<sup>4</sup>-Cu4-Cu1A<sup>4</sup> 57.318(9), I4-Cu4-I1A<sup>4</sup> 114.687(10), I4-Cu4-Cu1A<sup>4</sup> 57.624(8), S14-Cu4-I1A<sup>4</sup> 103.824(15), S14-Cu4-I4 110.421(14), S14-Cu4-Cu1A<sup>4</sup> 127.750(17), S15-Cu4-I1A<sup>4</sup> 95.011(13), S15-Cu4-I4 105.353(13), S15-Cu4-Cu1A<sup>4</sup> 104.282(14), S15-Cu4-S14 126.926(18). Symmetry transformations used to generate equivalent atoms: <sup>1</sup>+*x*,+*y*,1+*z*; <sup>2</sup>1-*x*, 2-*y*, 1-*z*; <sup>3</sup>1-*x*, 1-*y*,1-*z*; <sup>4</sup>+*x*,+*y*,-1+*z*.

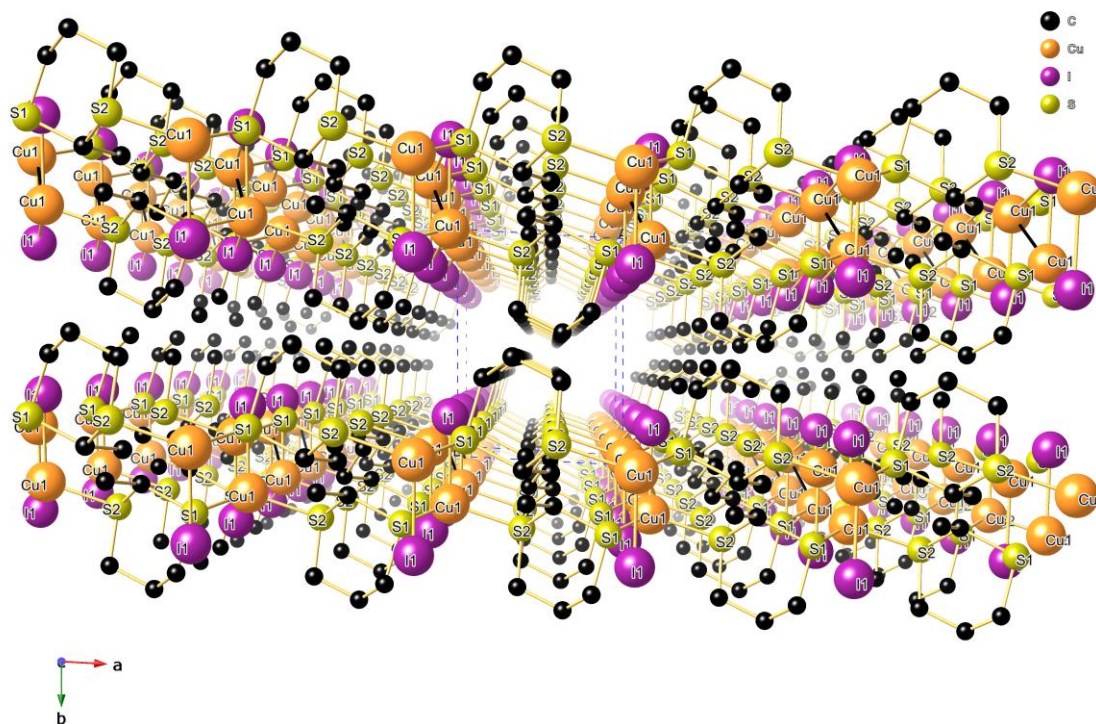

**Figure S2.** View down the  $c$  axis of two layers of the 2D network of  $[\{\text{Cu}(\mu_2\text{-I})_2\text{Cu}\}(\mu_4\text{-L1})]_n$  CP2.

Selected angles ( $^\circ$ ) at 100 K: S1–Cu–S2 118.02(3), S1–Cu–I 118.40(3), S1–Cu–I# 94.81(3), S2–Cu–I 97.77(3), S2–Cu–I# 107.86(3), I–Cu–I# 121.050(17), Cu–I–Cu# 58.950(17). Symmetry transformations used to generate equivalent atoms:  $^1-x, 2-y, 1-y$ ;  $^2-1+x, +y, +z$ ;  $^31-x, 2-y, 2-z$ .

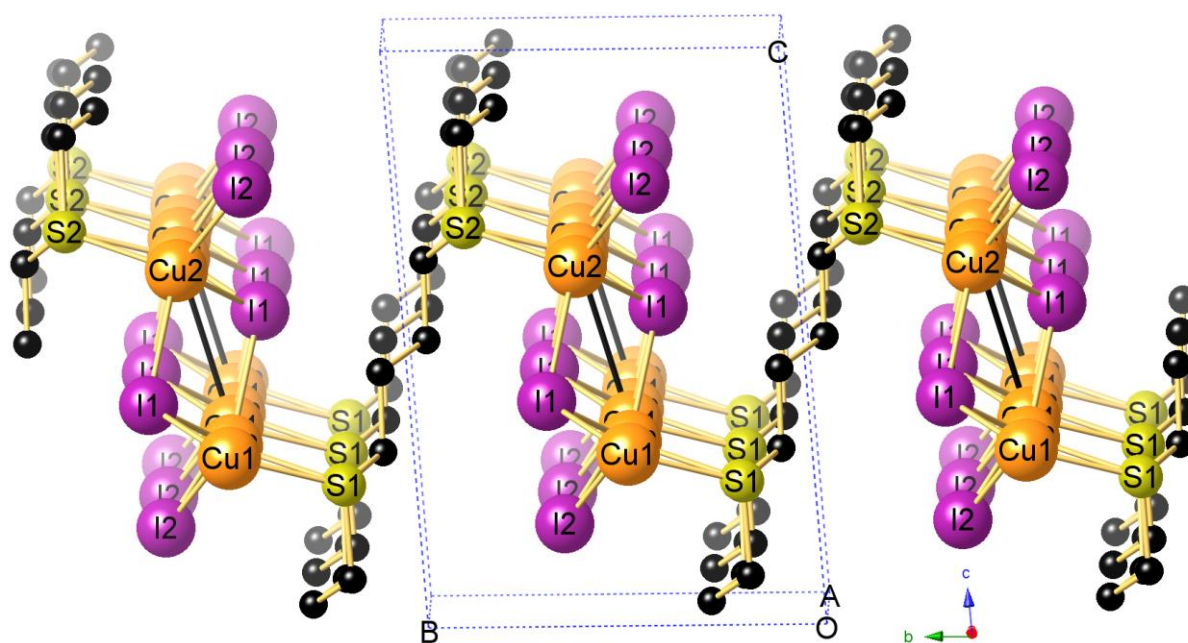

**Figure S3.** View down the  $a$  axis of the  $bc$  plane of CP3.



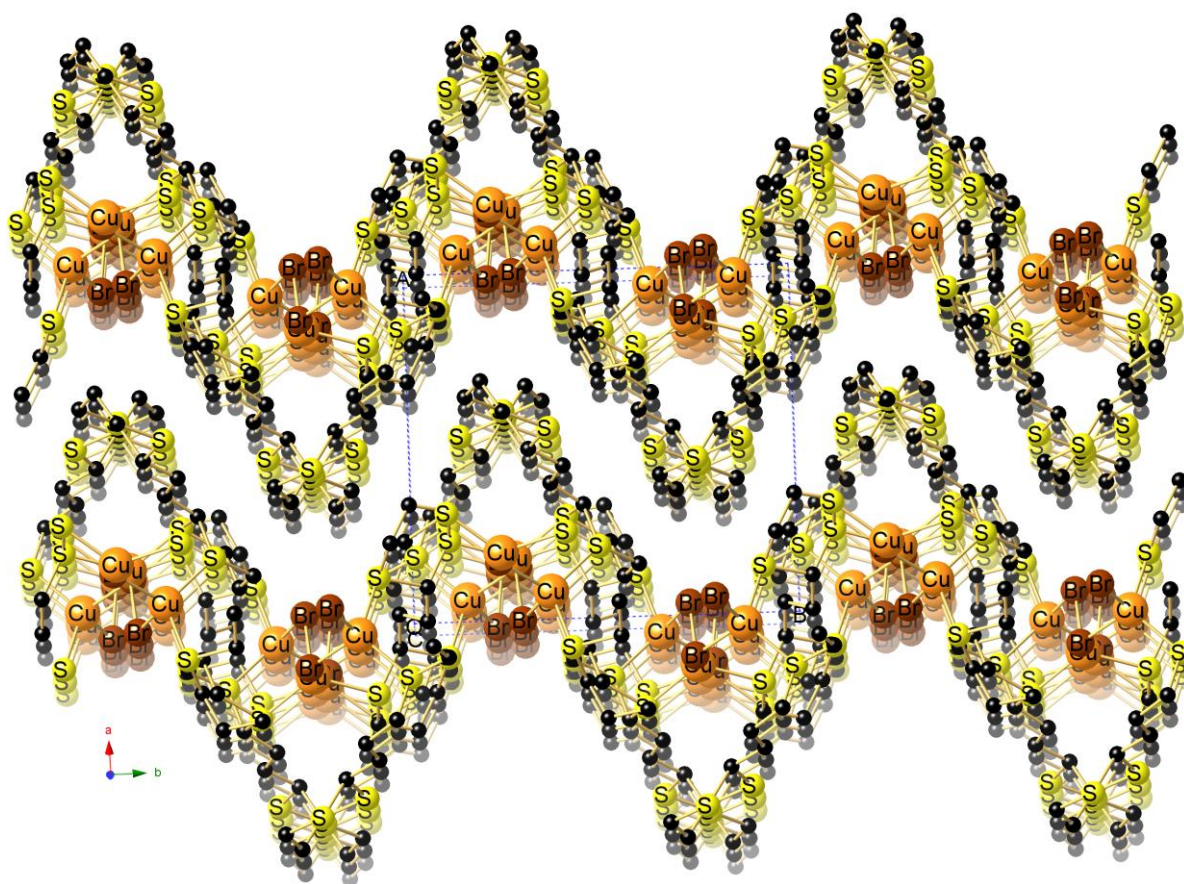

**Figure S4.** View down the *c* axis on the *ab* plane showing two layers of the 2D network of  $[\{\text{Cu}(\mu_2\text{-Br})\}_2(\mu_2\text{-L1})(\mu_4\text{-L1})_{0.5}]_n$  (CP4).

Selected bond angles [°] at 100 K: Cu2–Br1–Cu1<sup>1</sup> 97.945(19), Cu2–Br2–Cu1<sup>1</sup> 127.267(17), Br1–Cu1–Br2<sup>2</sup> 113.937(19), S1–Cu1–Br1 105.47(2), S1–Cu1–Br2<sup>2</sup> 100.66(2), S3–Cu1–Br1 112.49(2), S3–Cu1–Br2<sup>2</sup> 98.30(2), S3–Cu1–S1 125.31(3), Br1–Cu2–Br2 111.701(18), Br1–Cu2–Br2 111.701(18), S2<sup>3</sup>–Cu2–Br1 101.31(3), S2<sup>3</sup>–Cu2–Br2 106.02(2), S4–Cu2–Br1 114.21(2), S4–Cu2–Br2 109.49(3), S4–Cu2–S2<sup>3</sup> 113.64(3). Symmetry transformations used to generate equivalent atoms: <sup>1</sup> $+x, \frac{1}{2}-y, \frac{1}{2}+z$ ; <sup>2</sup> $1-x, 1-y, 1-z$ ; <sup>3</sup> $+x, \frac{1}{2}-y, +z$ , <sup>4</sup> $1-x, -\frac{1}{2}+y, \frac{1}{2}-z$ , <sup>5</sup> $1-x, \frac{1}{2}+y, \frac{1}{2}-z$ .

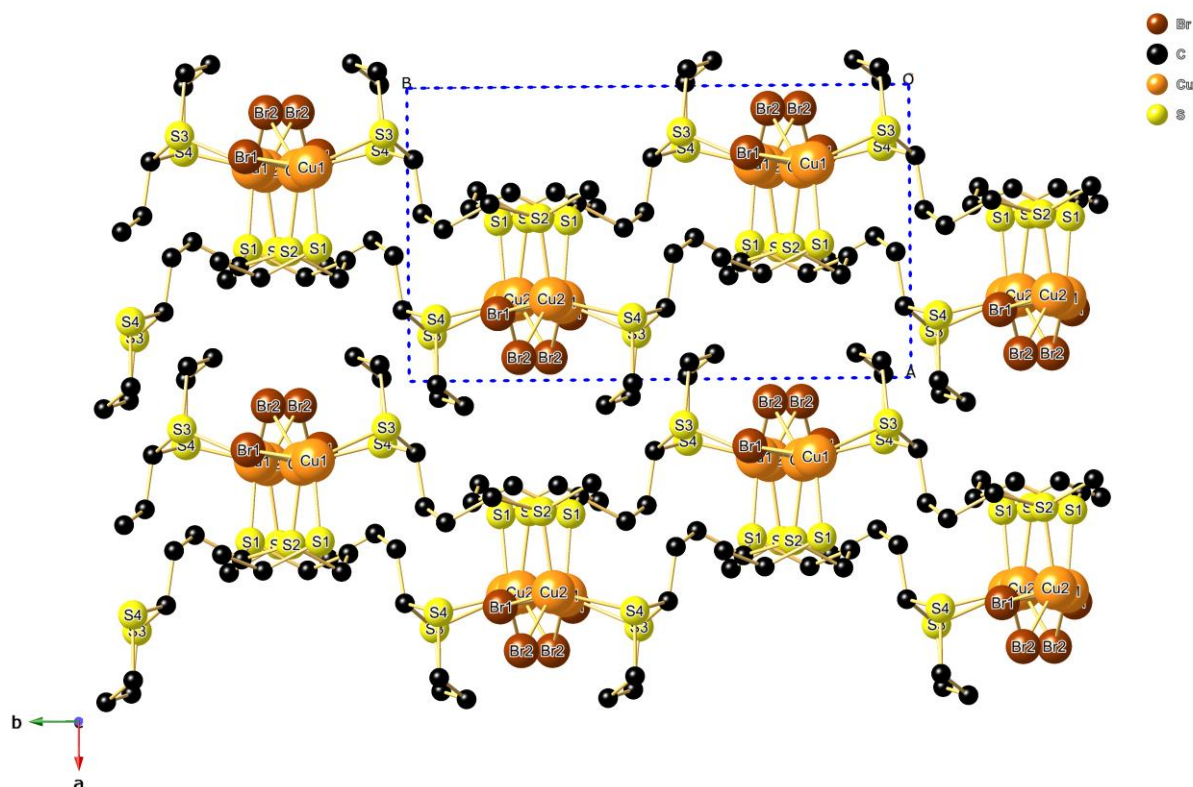

**Figure S5.** View down the  $c$  axis on the  $ab$  plane showing two layers of the 2D network of  $[\{\text{Cu}(\mu_2\text{-Br})_2(\mu_4\text{-L1})\}]_n$  CP5.

Selected bond angles [ $^\circ$ ] at 100 K: S1–Cu1–S3<sup>4</sup> 111.34(3), S2–Cu2–S4<sup>3</sup> 110.63(3), Cu1–Br1–Cu2<sup>1</sup> 95.446(17), Cu1–Br2–Cu2 100.585(17), Br1–Cu1–Br2 110.070(17), S1–Cu1–Br1 107.80(2), S1–Cu1–Br2 117.62(2), S3<sup>4</sup>–Cu1–Br1 113.18(2), S3<sup>4</sup>–Cu1–Br2 96.68(2), Br2–Cu2–Br1<sup>2</sup> 103.363(17), S2–Cu2–Br1<sup>2</sup> 101.45(2), S2–Cu2–Br2 118.97(2), S4<sup>3</sup>–Cu2–Br1<sup>2</sup> 122.25(2), S4<sup>3</sup>–Cu2–Br2 101.16(2) Symmetry transformations used to generate equivalent atoms: <sup>1</sup> $x, \frac{1}{2}y, \frac{1}{2}+z$ ; <sup>2</sup> $+x, \frac{1}{2}-y, \frac{1}{2}+z$ ; <sup>3</sup> $1-x, -1/2+y, 1/2-z$ ; <sup>4</sup> $1-x, 1-y, 1-z$ .

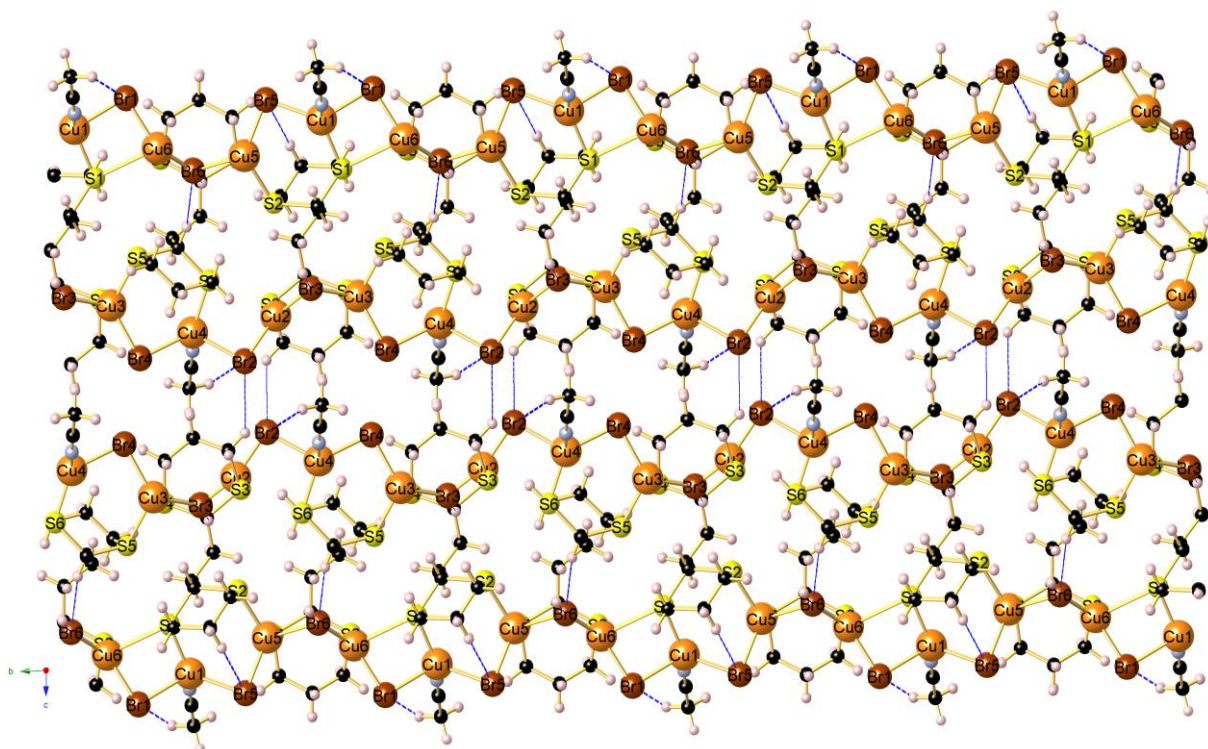

**Figure S6.** A view along the *b* axis of the crystal packing of **CP6**. The C—H···Br hydrogen bonds are shown as dashed lines.

Selected bond angles [°] at 100 K: Cu6-Br1-Cu1 86.095(11), Cu2-Br2-Cu4<sup>1</sup> 85.690(10), Cu2-Br3-Cu3 86.593(10), Cu3-Br4-Cu4 88.610(10), Cu5-Br5-Cu1<sup>2</sup> 87.092(10), Cu6-Br6-Cu5 90.168(10), Br5<sup>1</sup>-Cu1-Br1 114.647(11), S1-Cu1-Br1 88.147(13), S1-Cu1-Br5<sup>1</sup> 116.754(14), N1-Cu1-Br1 102.761(5), N1-Cu1-Br5<sup>1</sup> 103.15(5), N1-Cu1-S1 129.55(5), Br3-Cu2-Br2 113.534(11), S3-Cu2-Br2 119.320(15), S3-Cu2-Br3 127.119(15), Br4-Cu3-Br3 110.546(11), S4-Cu3-Br3 119.028(143), S4-Cu3-Br4 110.145(14), S4-Cu3-S5 110.445(17), S5-Cu3-Br3 89.848(13), S5-Cu3-Br4 115.767(14), Br4-Cu4-Br2<sup>2</sup> 110.040(10), S6-Cu4-Br2<sup>2</sup> 92.521(14), S6-Cu4-Br4 119.944(14), N2-Cu4-Br2<sup>2</sup> 101.94(5), N2-Cu4-Br4 100.99(5), N2-Cu4-S6 128.49(5), Br5-Cu5-Br6 111.723(10), S2<sup>2</sup>-Cu5-Br5 118.267(14), S2<sup>2</sup>-Cu5-Br6 91.616(13), S7-Cu5-Br5 108.229(143), S7-Cu5-Br6 116.736(13), S7-Cu5-S2<sup>2</sup> 109.898(16), Br1-Cu6-S1 81.800(12), Br6-Cu6-Br1 118.119(12), Br6-Cu6-S1 105.731(14), S8-Cu6-Br1 114.194(15), S8-Cu6-Br6 125.243(15), S8-Cu6-S1 96.326(16), Cu1-S1-Cu6 84.189(15) Symmetry transformations used to generate equivalent atoms: <sup>1</sup>+*x*, -1+*y*, +*z*; <sup>2</sup>+*x*, 1+*y*, +*z*.



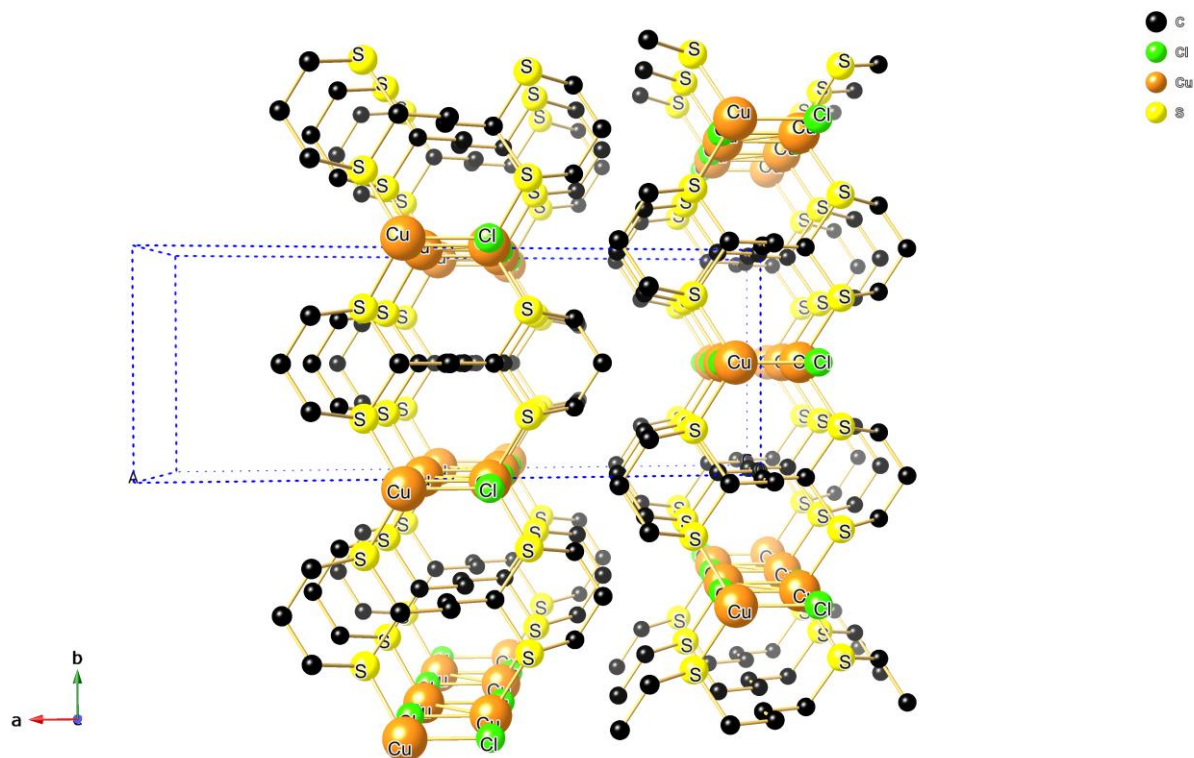

**Figure S7.** View down the *c* axis on the *ab* plane showing two layers of the 2D network of  $[\{\text{Cu}(\mu_2\text{-Cl})_2\text{Cu}\}(\mu_4\text{-L1})]_n$  CP7.

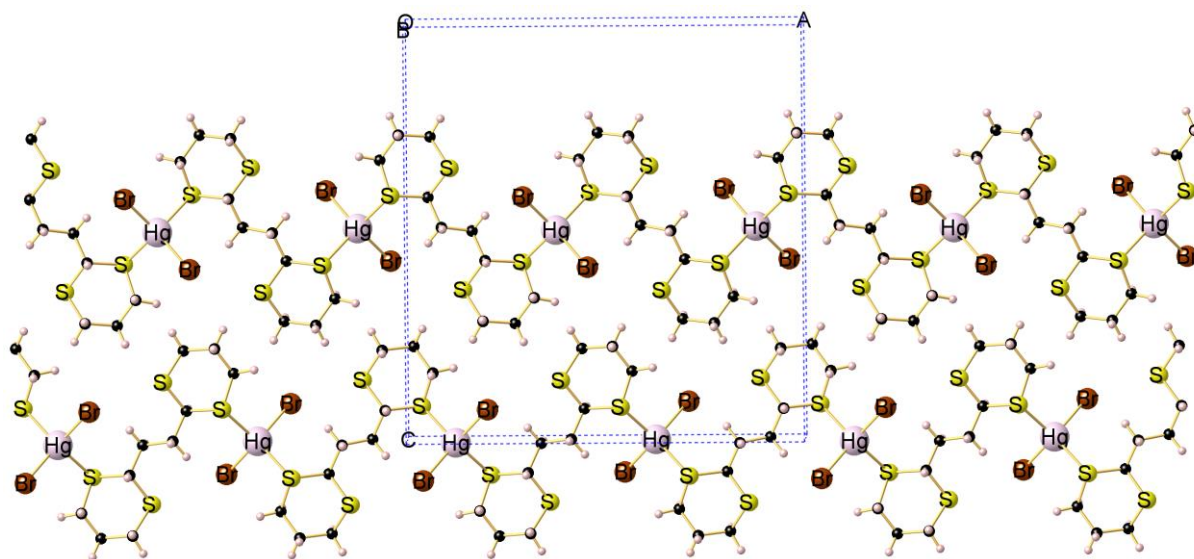

**Figure S8.** View of the unit cell of CP9 containing two parallel running 1D ribbons.



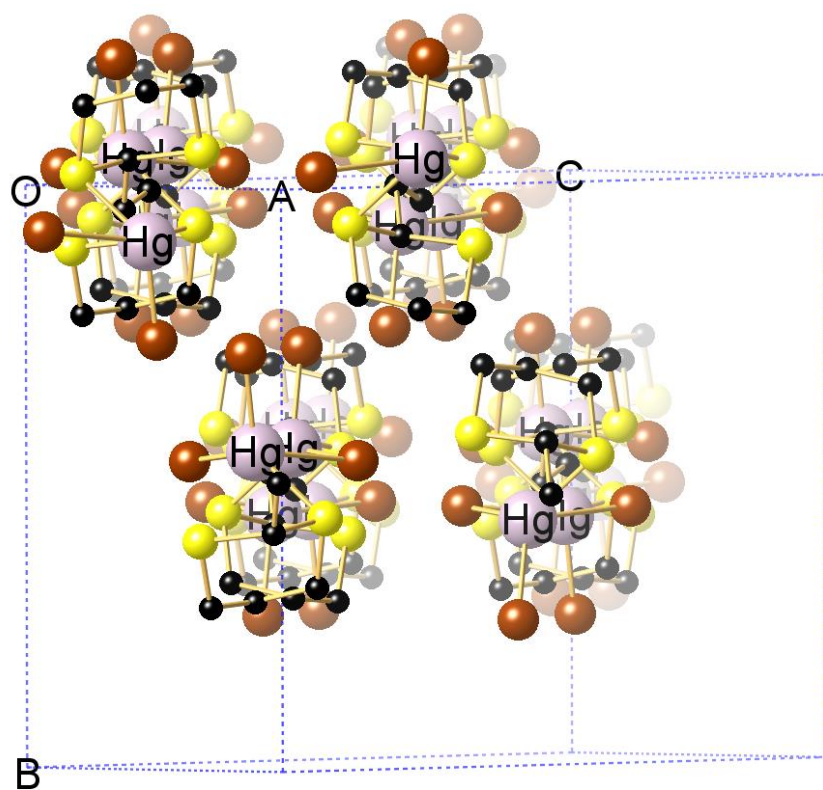

**Figure S9.** View of the packing of the ribbons of **CP10** within the unit cell.

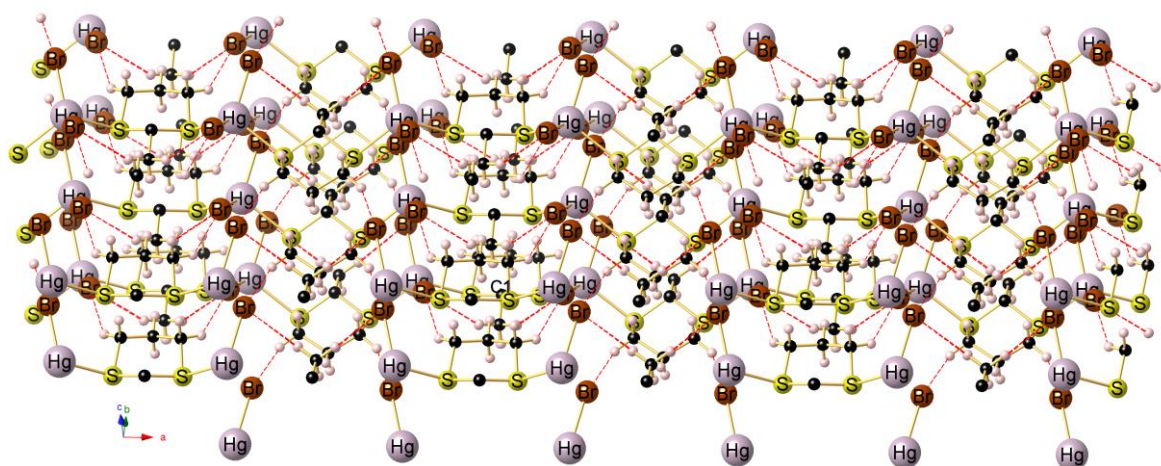

**Figure S10.** View of the association of parallel running 1D chains of  $[(\text{HgBr}_2)(\mu_2\text{-L2})]_n$  (**CP11**) through intermolecular H...Br bonding generating a 3D supramolecular network.

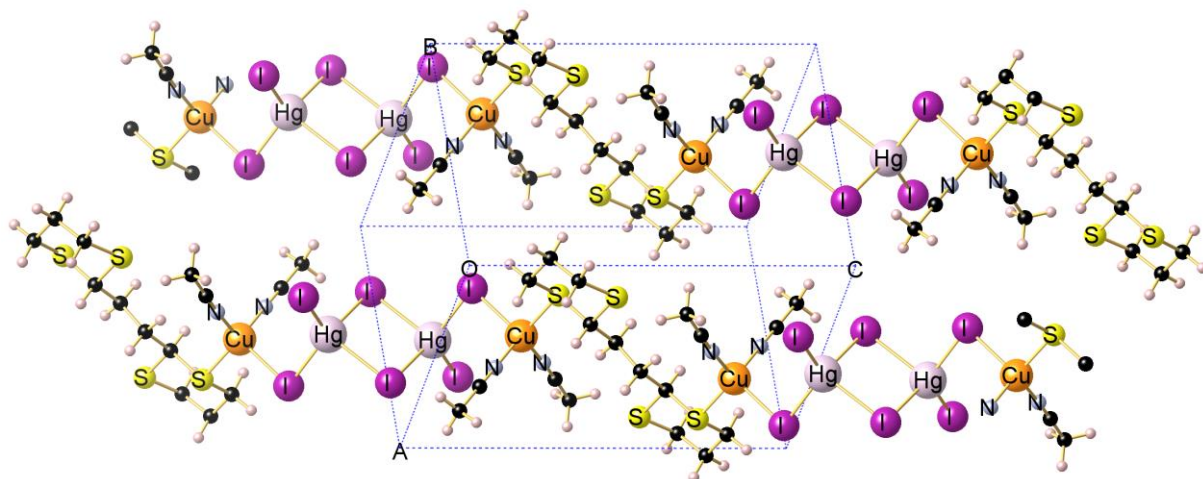

**Figure S11.** Parallel arrangement of the ribbons of CP13 in the packing.

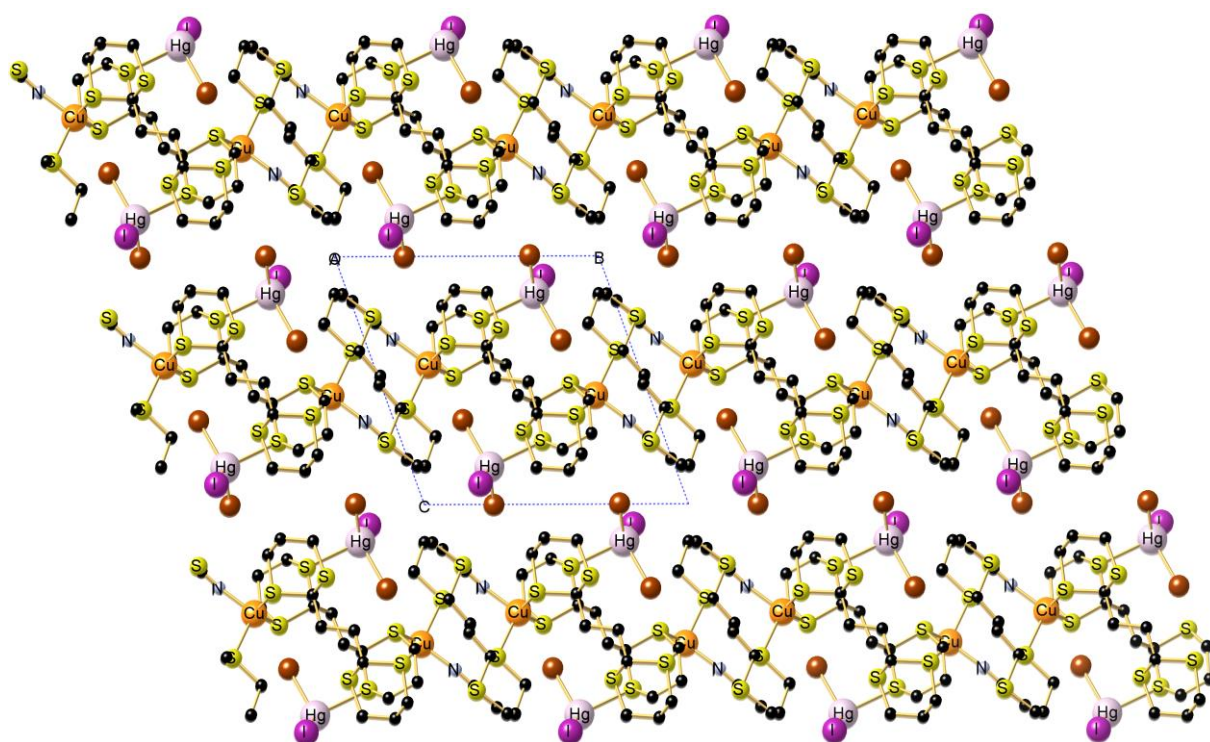

**Figure S12.** View of the packing of three layers of the 2D network of  $[\{\text{Cu}(\text{MeCN})\}(\text{HgIBr}_2)(\mu_2\text{-L1})_{1.5}]_n$  (CP15).

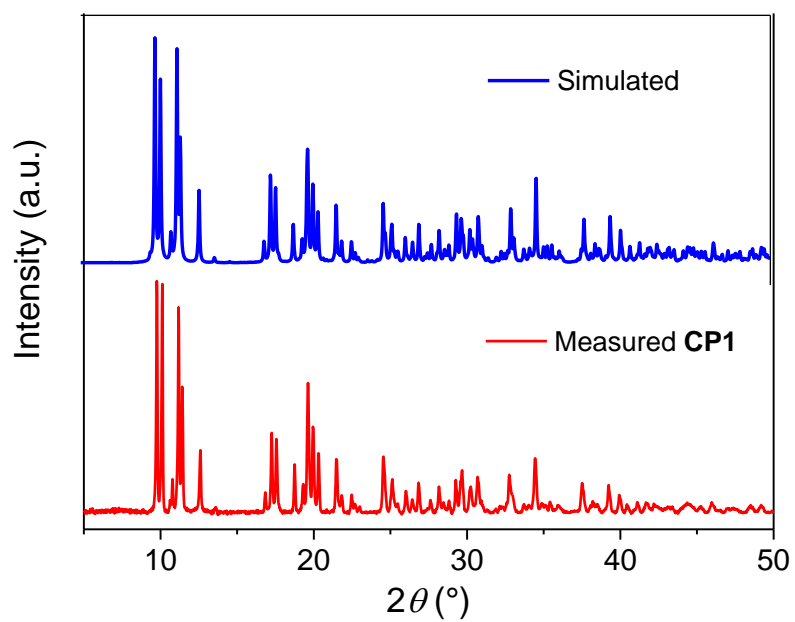

**Figure S13.** Simulated and experimental PXRD patterns of **CP1**.

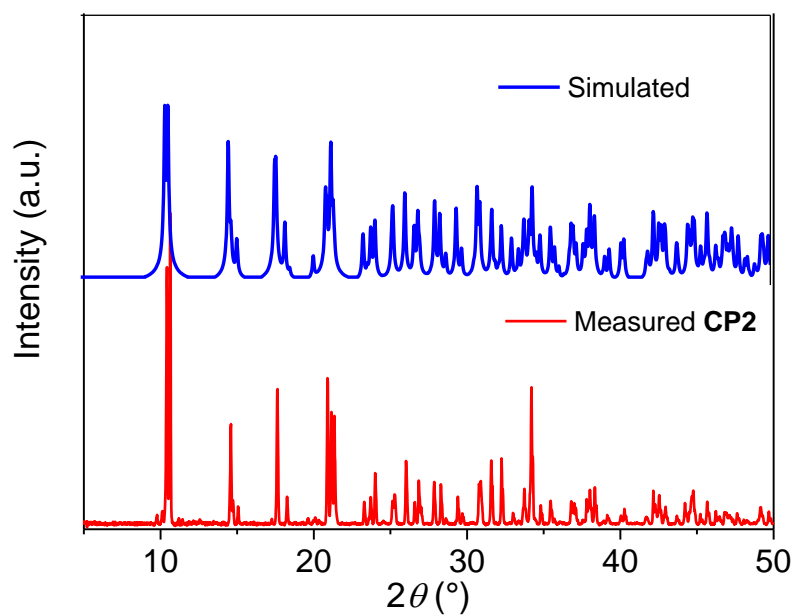

**Figure S14.** Simulated and experimental PXRD patterns of **CP2**.



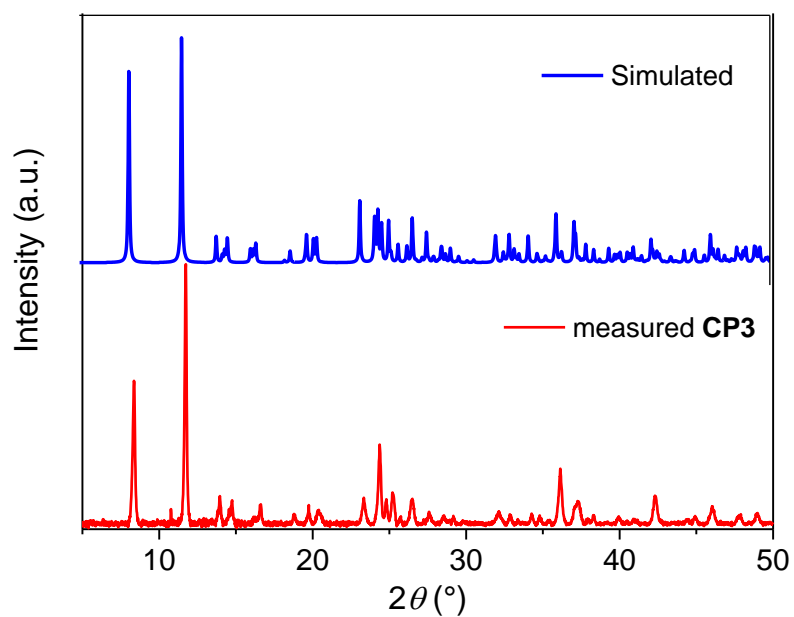

**Figure S15.** Simulated and experimental PXRD patterns of **CP3**.

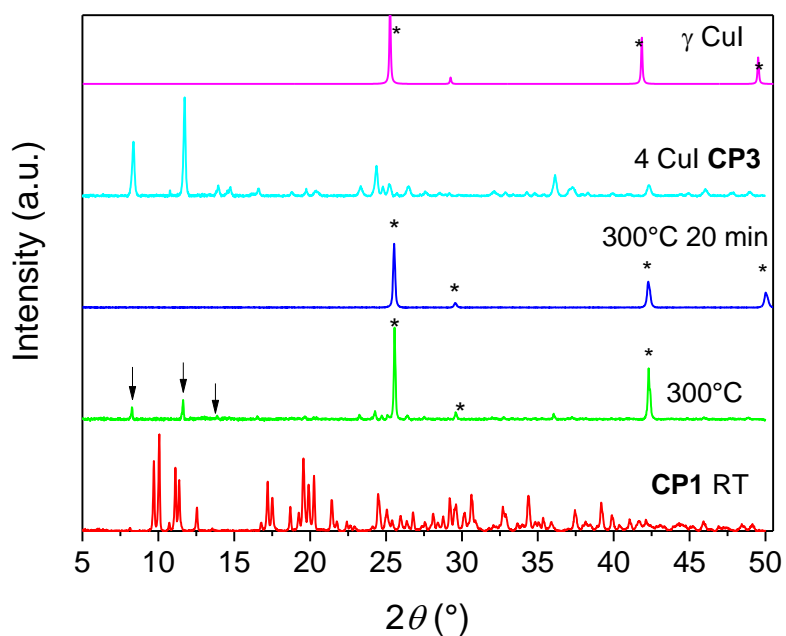

**Figure S16.** PXRD pattern of **CP1** before and after heating at 300°C. Arrows and asterisk are assigned to **CP3** and  $\gamma$ -CuI respectively.

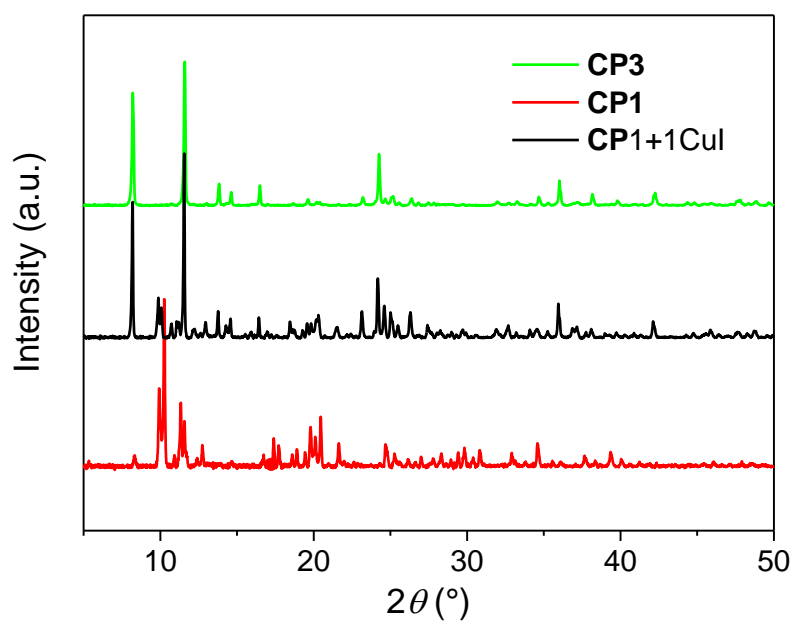

**Figure S17.** PXRd pattern of **CP1** before and after addition of 1 equivalent CuI. Comparison with the PXRd of **CP3**.

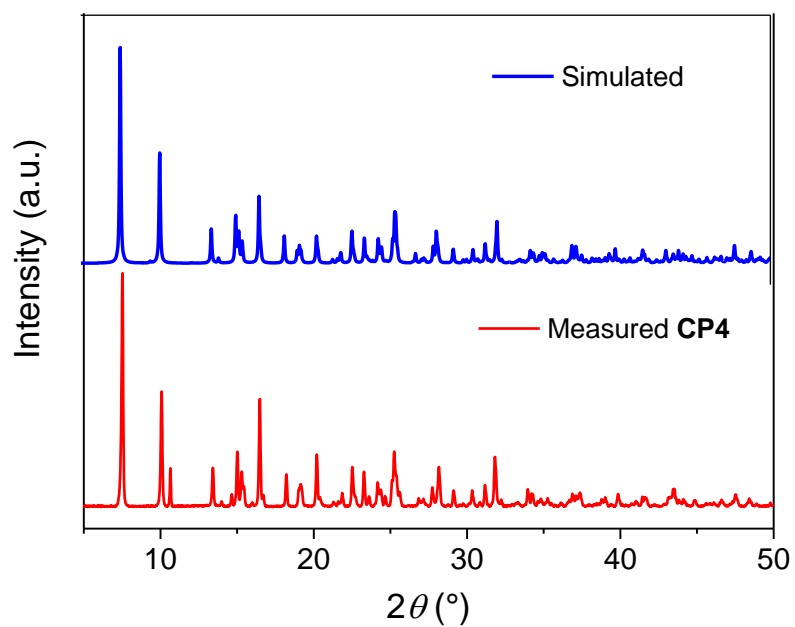

**Figure S18.** Simulated and experimental PXRd patterns of **CP4**.

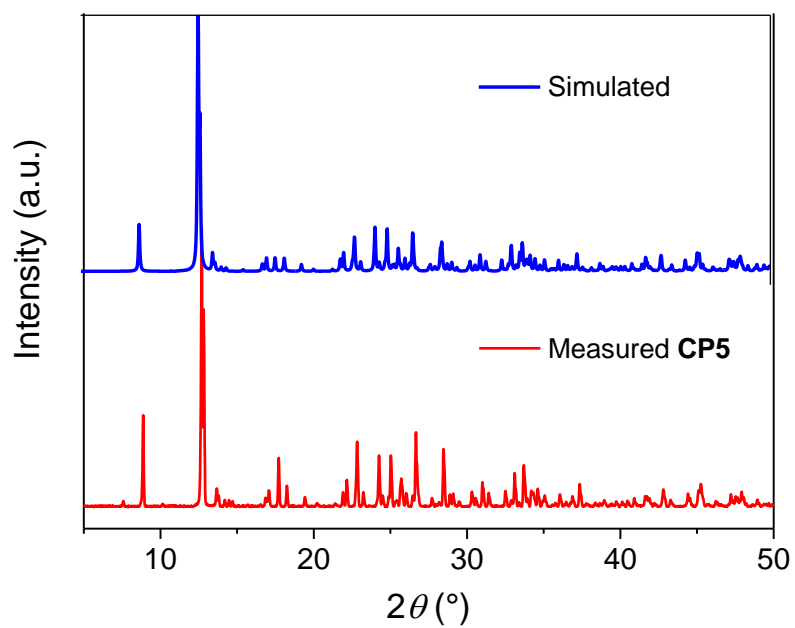

**Figure S19.** Simulated and experimental PXRD patterns of **CP5**.

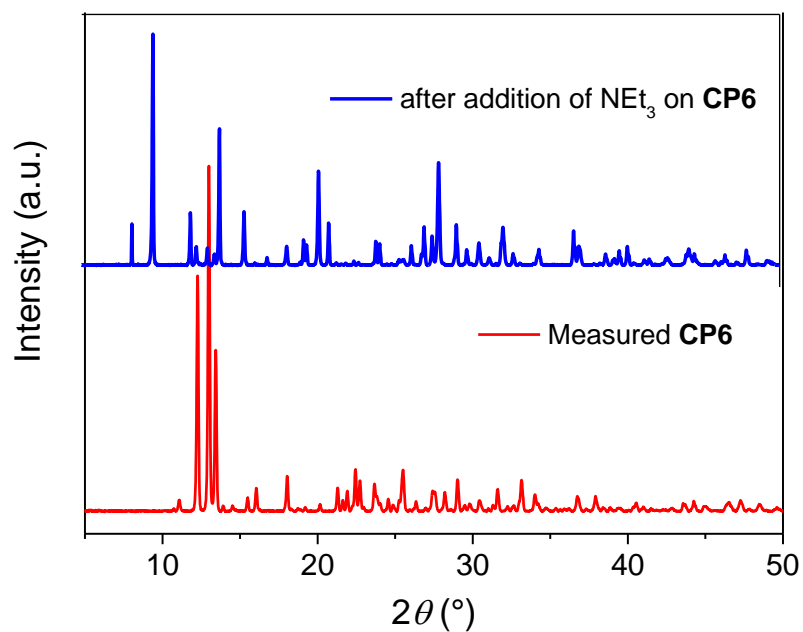

**Figure S20.** PXRD patterns of **CP6** before and after exposure to  $\text{NEt}_3$ .



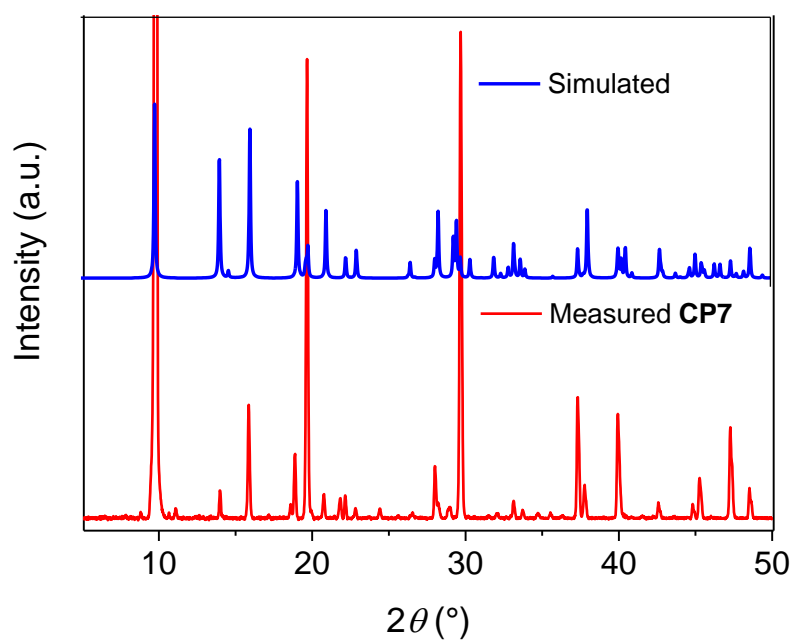

**Figure S21.** Simulated and experimental PXRD patterns of **CP7**.

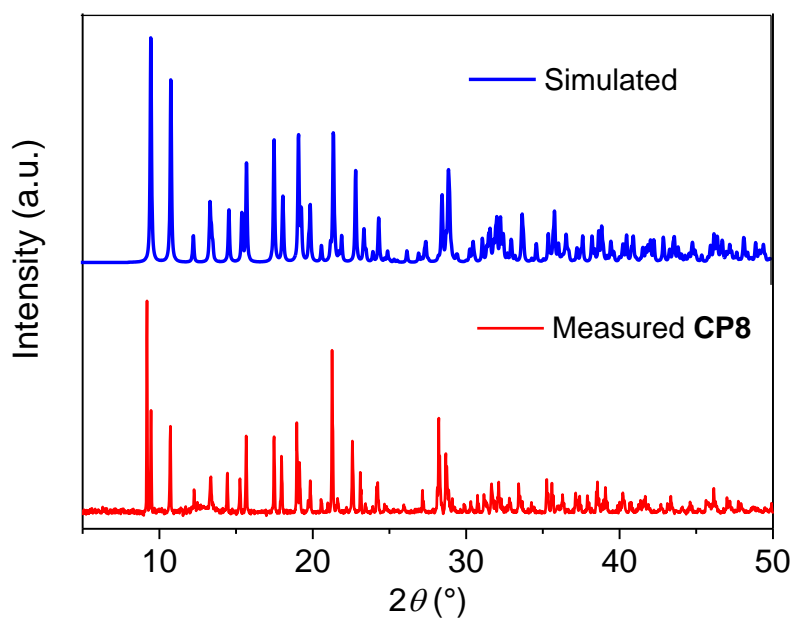

**Figure S22.** Simulated and experimental PXRD patterns of **CP8**.

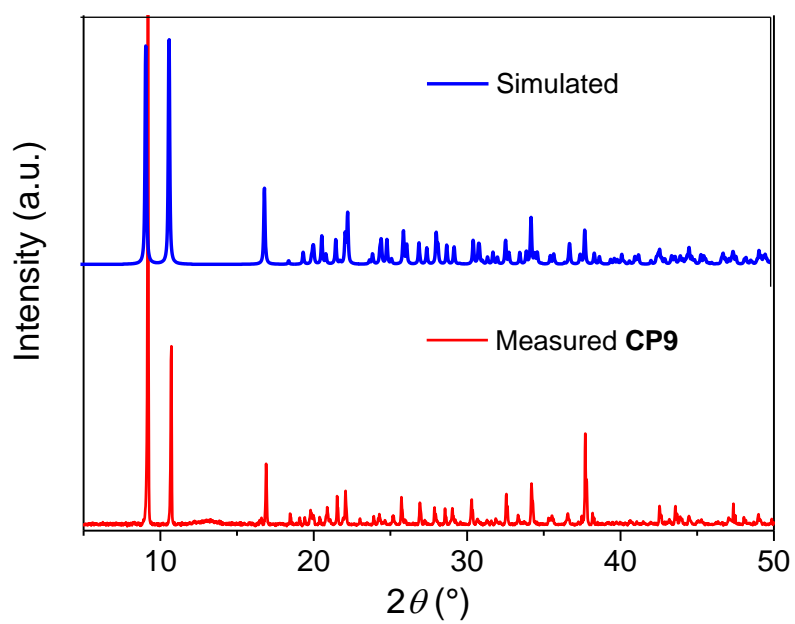

**Figure S23.** Simulated and experimental PXRD patterns of **CP9**.

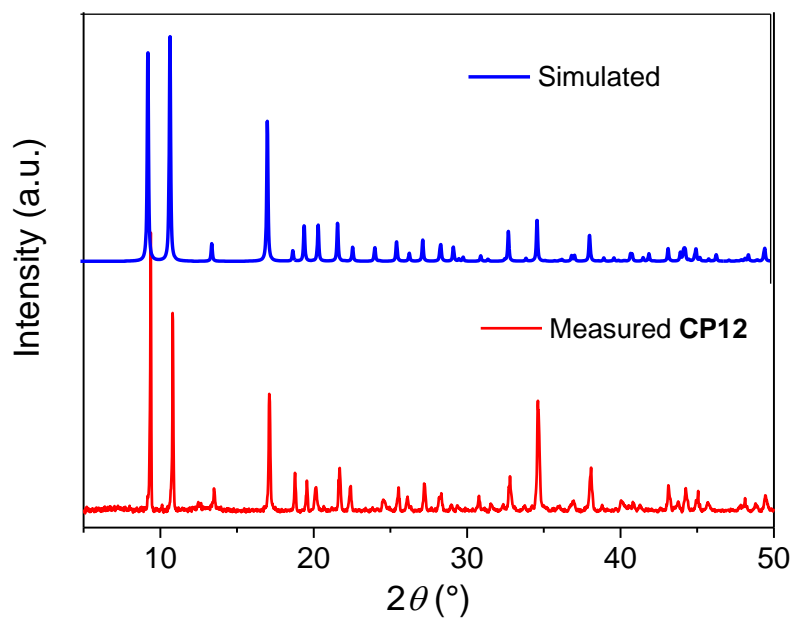

**Figure S24.** Simulated and experimental PXRD patterns of **CP12**.

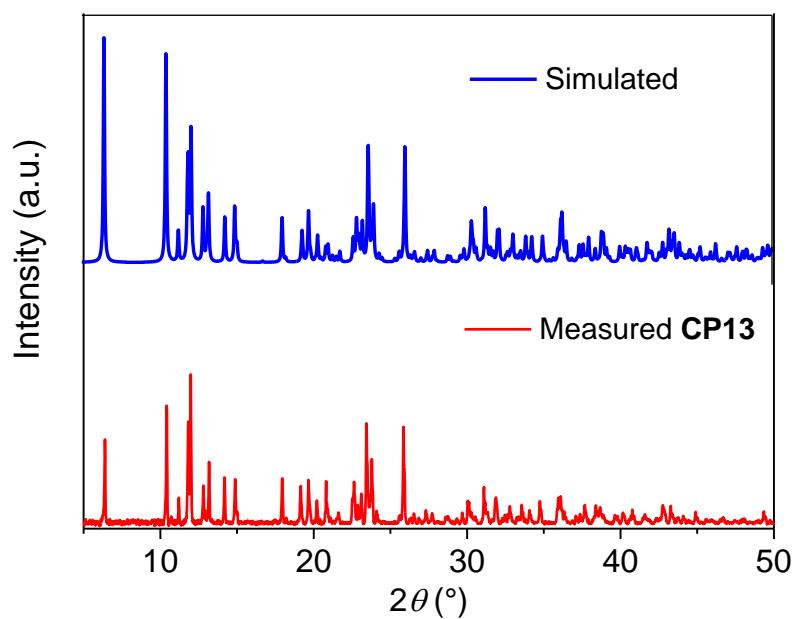

**Figure S25.** Simulated and experimental PXRD patterns of **CP13**.

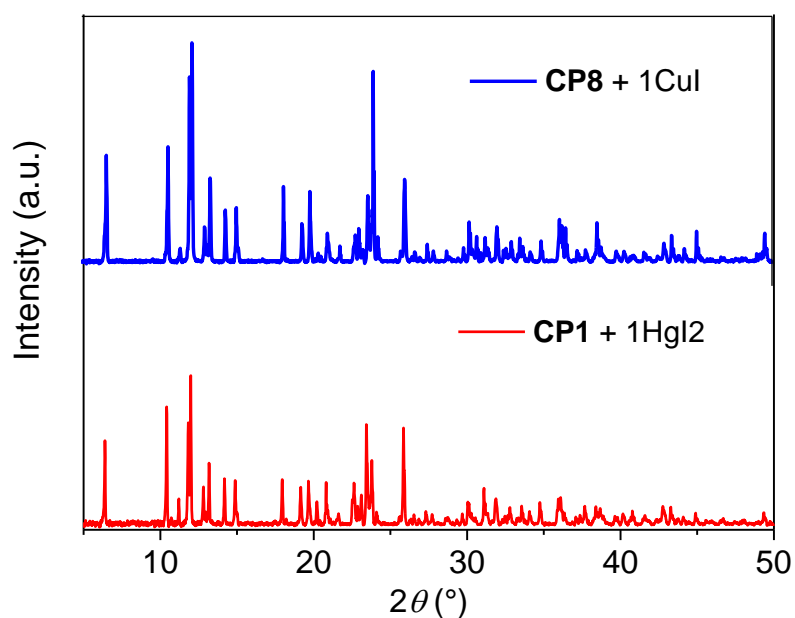

**Figure S26.** Experimental PXRD patterns of **CP13** obtained by addition of 1CuI to **CP8** and of 1HgI<sub>2</sub> to **CP1**.



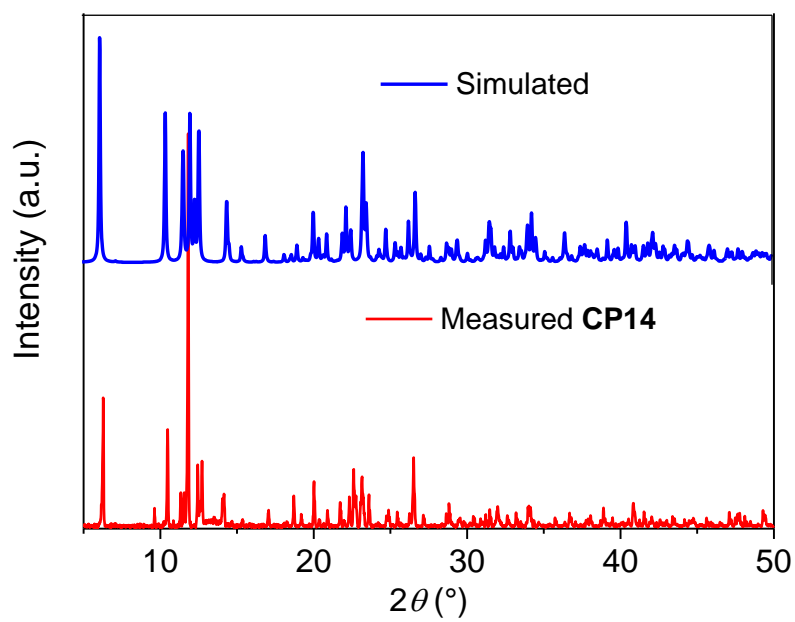

**Figure S27.** Simulated and experimental PXRD patterns of **CP14**.

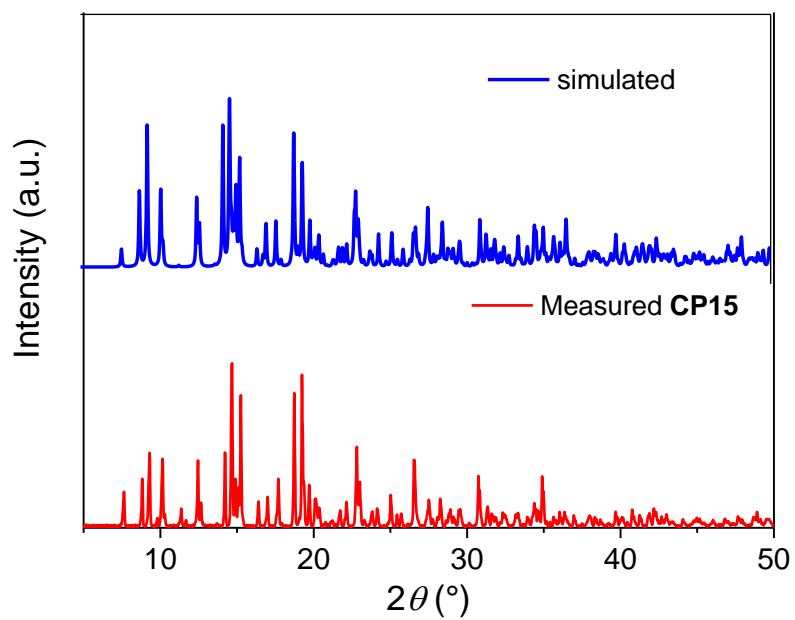

**Figure S28.** Simulated and experimental PXRD patterns of **CP15**.

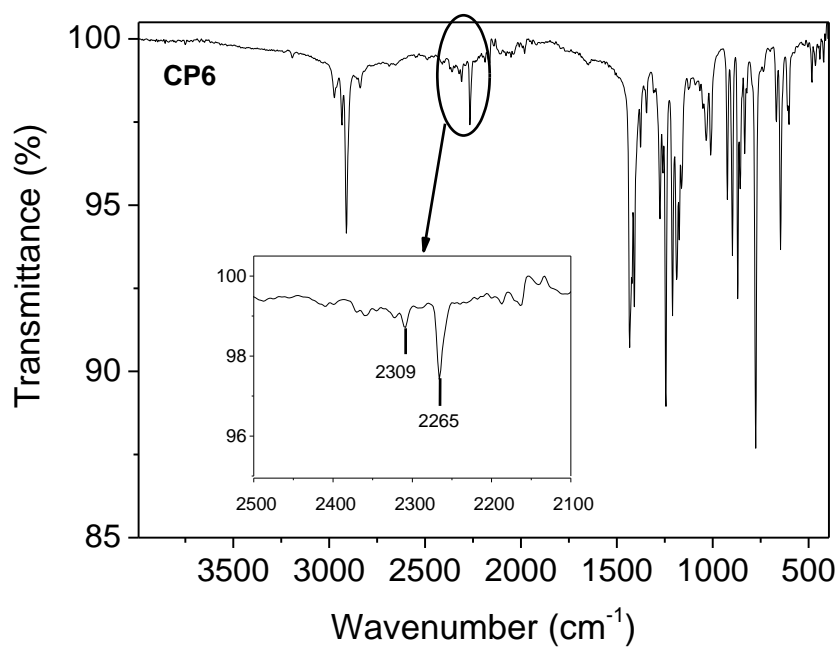

**Figure S29.** ATR-IR spectrum of CP6.

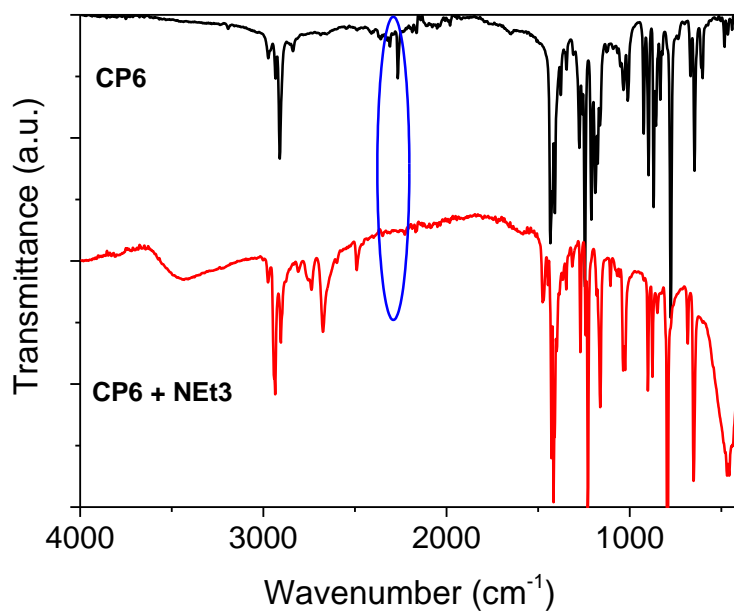

**Figure S30.** IR spectra of CP6 before and after exposure to NEt<sub>3</sub>.

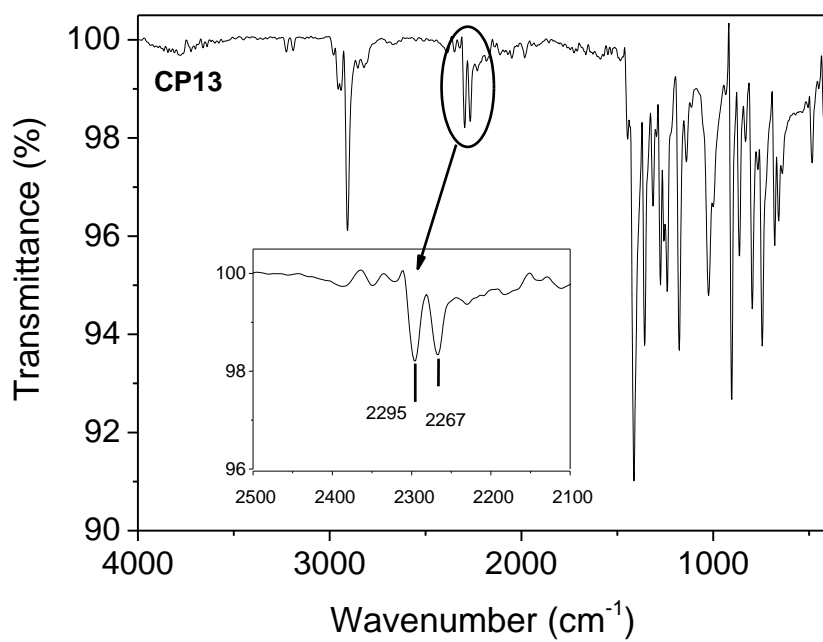

**Figure S31.** ATR-IR spectrum of **CP13**.

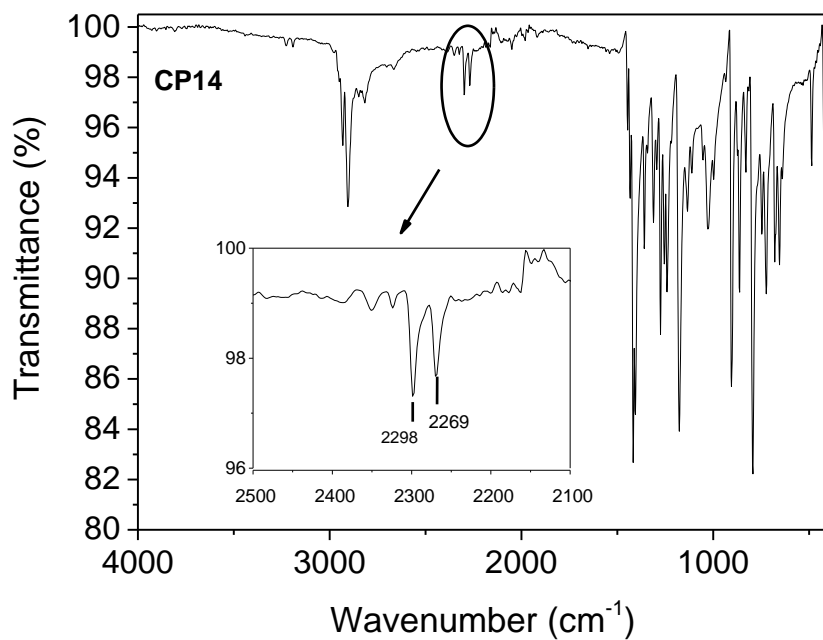

**Figure S32.** ATR-IR spectrum of **CP14**.

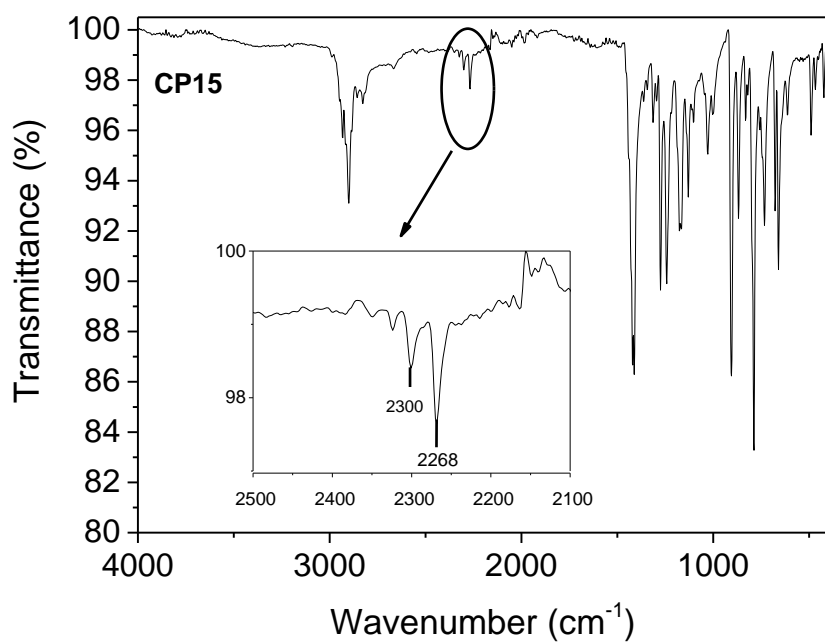

**Figure S33.** ATR-IR spectrum of **CP15**.

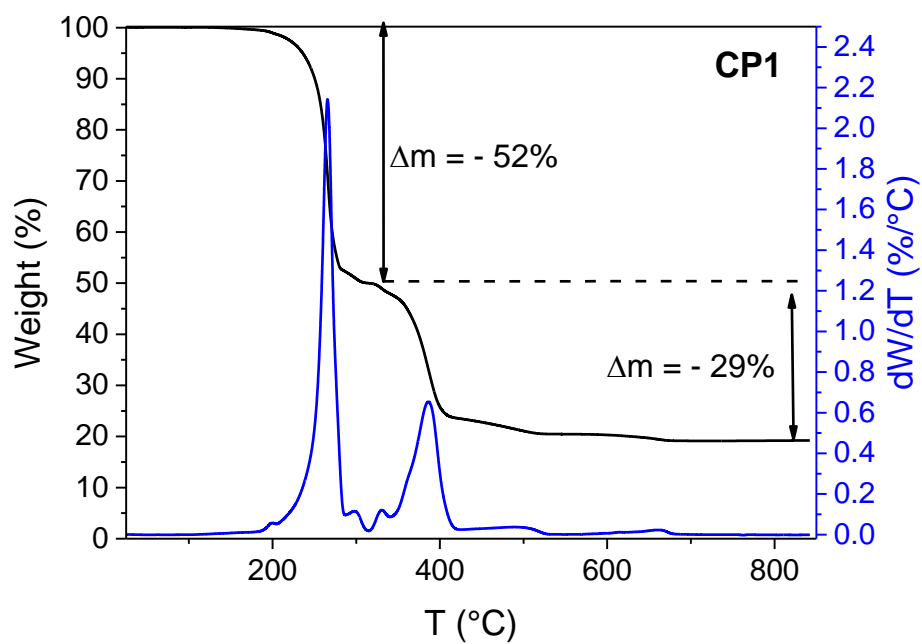

**Figure S34.** TGA traces and its first derivatives of **CP1** under air flow.

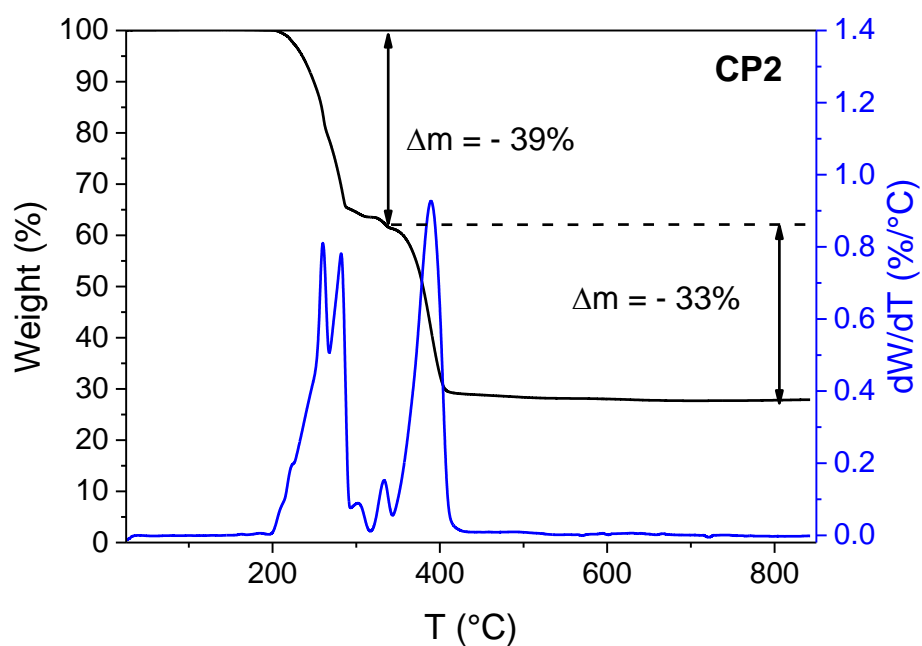

**Figure S35.** TGA traces and its first derivatives of **CP2** under air flow.

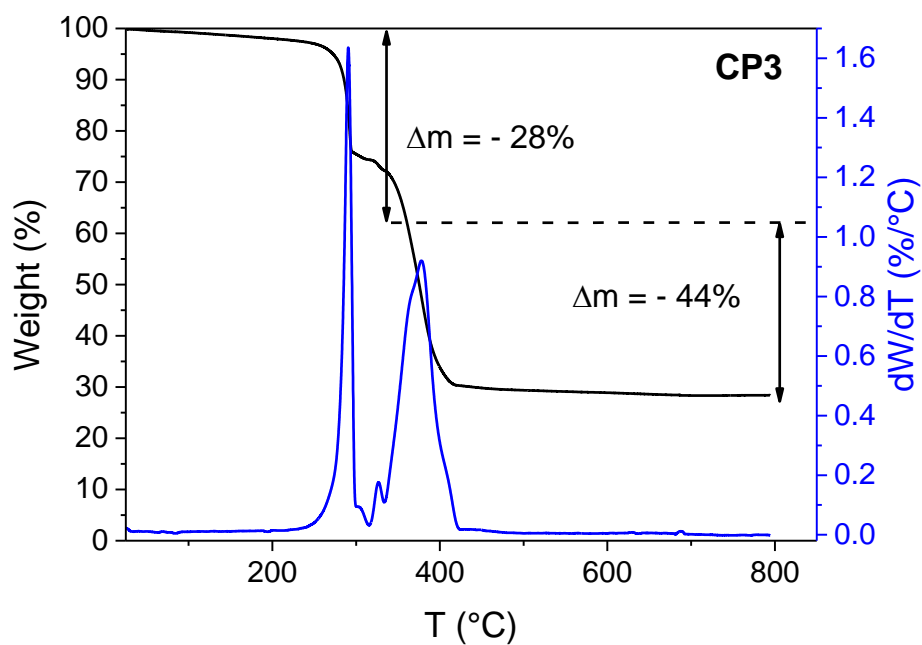

**Figure S36.** TGA traces and its first derivatives of **CP3** under air flow.



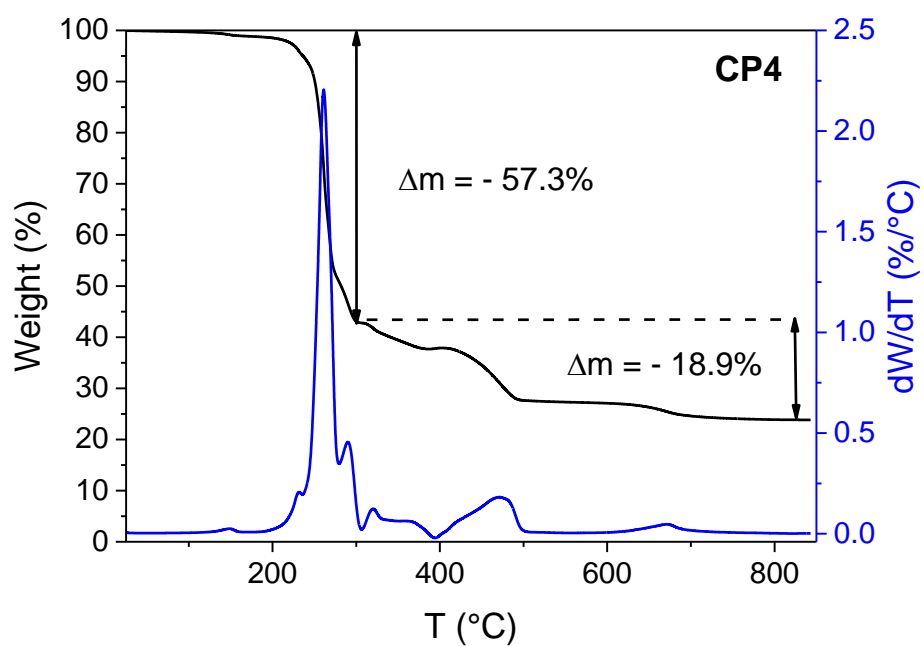

**Figure S37.** TGA traces and its first derivatives of **CP4** under air flow.

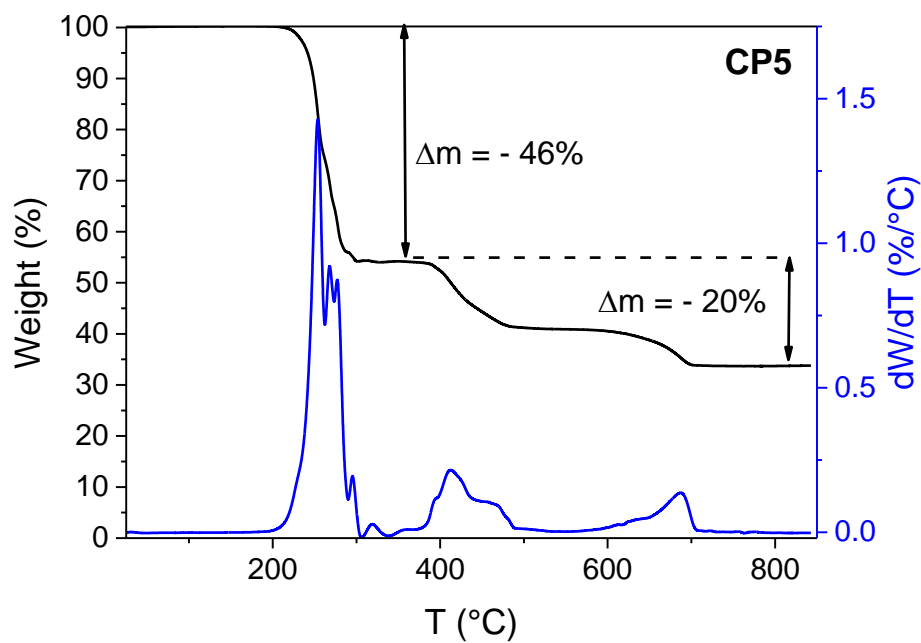

**Figure S38.** TGA traces and its first derivatives of **CP5** under air flow.

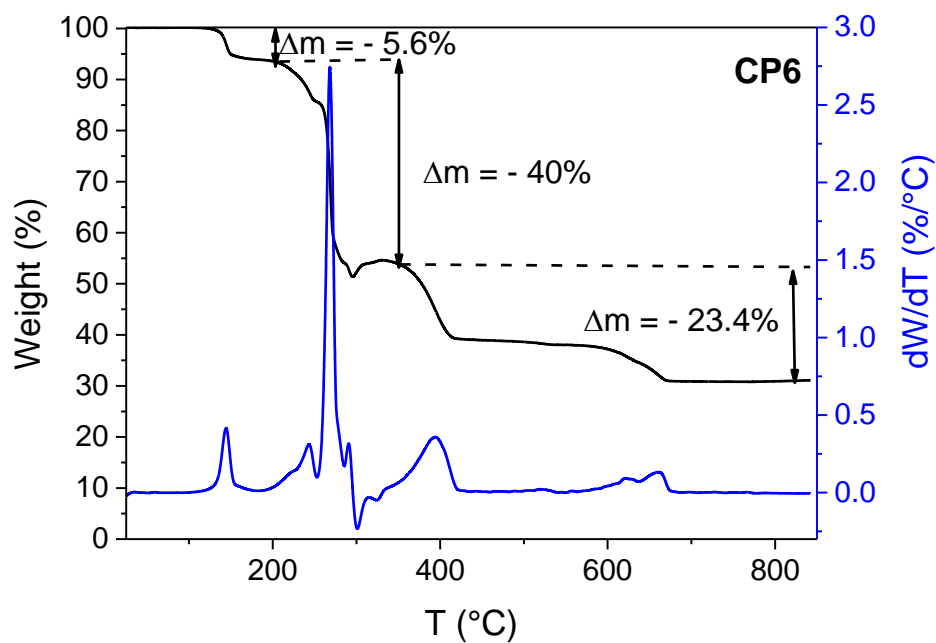

**Figure S39.** TGA traces and its first derivatives of **CP6** under air flow.

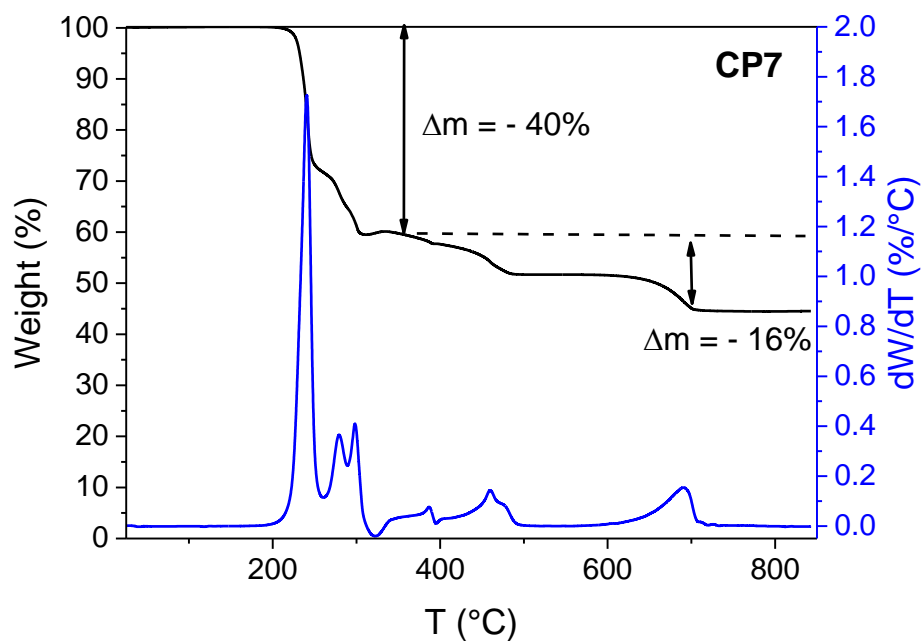

**Figure S40.** TGA traces and its first derivatives of **CP7** under air flow.

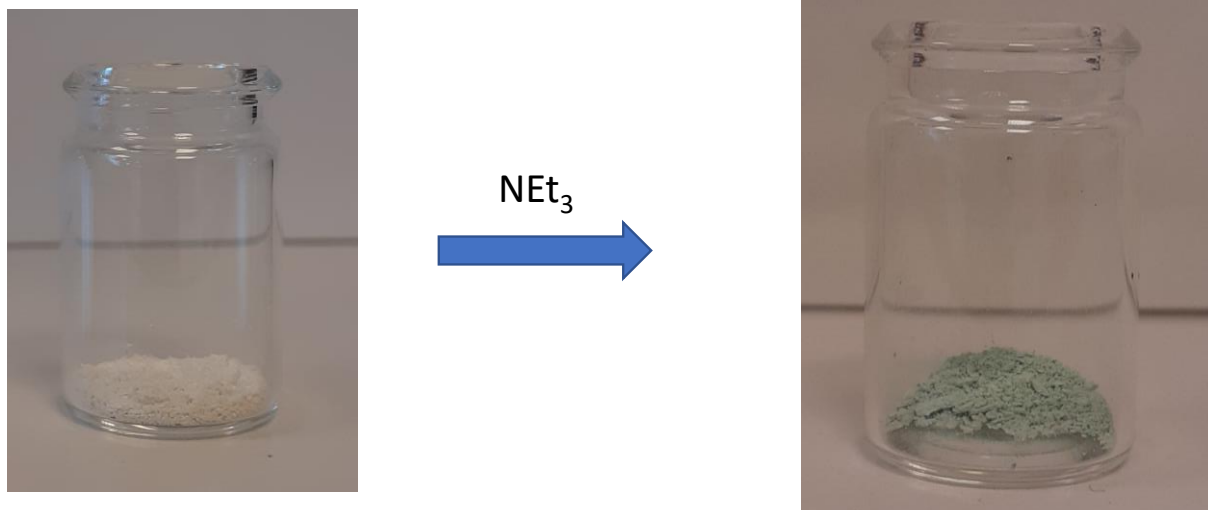

**Figure S41.** Images of **CP6** before and after exposure to  $\text{NEt}_3$  vapor.

**Table S1.** Crystal Data, Data Collection and Structure Refinement for **L1** and **CP1**.

| Compound                                            | <b>L1</b>                                                         | <b>CP1</b>                                                                     |
|-----------------------------------------------------|-------------------------------------------------------------------|--------------------------------------------------------------------------------|
| Formula                                             | C <sub>10</sub> H <sub>18</sub> S <sub>4</sub>                    | C <sub>40</sub> H <sub>72</sub> Cu <sub>4</sub> I <sub>4</sub> S <sub>16</sub> |
| Formula weight                                      | 266.48                                                            | 1827.69                                                                        |
| Temperature/K                                       | 100.0                                                             | 100.0                                                                          |
| Wavelength/Å                                        | 0.71073                                                           | 0.71073                                                                        |
| Crystal system                                      | monoclinic                                                        | monoclinic                                                                     |
| Space group                                         | P2 <sub>1</sub> /n                                                | P2 <sub>1</sub> /n                                                             |
| <i>a</i> /Å                                         | 4.8578(3)                                                         | 18.4505(6)                                                                     |
| <i>b</i> /Å                                         | 10.6581(6)                                                        | 18.2209(5)                                                                     |
| <i>c</i> /Å                                         | 12.0302(11)                                                       | 19.1191(7)                                                                     |
| $\alpha$ /°                                         | 90                                                                | 90                                                                             |
| $\beta$ /°                                          | 92.676(4)                                                         | 110.0440(10)                                                                   |
| $\gamma$ /°                                         | 90                                                                | 90                                                                             |
| Volume/ Å <sup>3</sup>                              | 622.18(8)                                                         | 6038.2(3)                                                                      |
| <i>Z</i>                                            | 2                                                                 | 4                                                                              |
| Density (calc.) g/cm <sup>3</sup>                   | 1.422                                                             | 2.010                                                                          |
| Absorption coefficient/mm <sup>-1</sup>             | 0.725                                                             | 4.018                                                                          |
| <i>F</i> (000)                                      | 284.0                                                             | 3584.0                                                                         |
| Crystal size/mm <sup>3</sup>                        | 1.177 × 0.158 × 0.14                                              | 0.453 × 0.384 × 0.062                                                          |
| 2 $\theta$ range for data collection/°              | 5.108 to 72.732                                                   | 4.394 to 59.998                                                                |
| Index ranges                                        | -8 ≤ <i>h</i> ≤ 8,<br>-17 ≤ <i>k</i> ≤ 17,<br>-18 ≤ <i>l</i> ≤ 20 | -25 ≤ <i>h</i> ≤ 25,<br>-25 ≤ <i>k</i> ≤ 25,<br>-26 ≤ <i>l</i> ≤ 26            |
| Reflections collected                               | 12460                                                             | 121045                                                                         |
| Independent reflections                             | 3000 [R <sub>int</sub> = 0.0306]                                  | 17609 [R <sub>int</sub> = 0.0322]                                              |
| Refinement method                                   | Full-matrix least-squares on <i>F</i> <sup>2</sup>                | Full-matrix least-squares on <i>F</i> <sup>2</sup>                             |
| Data / restraints / parameters                      | 3000/0/64                                                         | 17609/0/588                                                                    |
| Goodness-of-fit on <i>F</i> <sup>2</sup>            | 1.057                                                             | 1.082                                                                          |
| Final <i>R</i> indices [ <i>I</i> > 2σ( <i>I</i> )] | R <sub>1</sub> = 0.0215, wR <sub>2</sub> = 0.0545                 | R <sub>1</sub> = 0.0205, wR <sub>2</sub> = 0.0449                              |
| <i>R</i> indices (all data)                         | R <sub>1</sub> = 0.0255, wR <sub>2</sub> = 0.0566                 | R <sub>1</sub> = 0.0253, wR <sub>2</sub> = 0.0478                              |
| Largest diff. peak and hole/e. Å <sup>-3</sup>      | 0.44/-0.28                                                        | 2.09/-1.05                                                                     |

**Table S2.** Crystal Data, Data Collection and Structure Refinement for **CP2** and **CP3**.

| Compound                                            | CP2                                                                           | CP3                                                                         |
|-----------------------------------------------------|-------------------------------------------------------------------------------|-----------------------------------------------------------------------------|
| Formula                                             | C <sub>10</sub> H <sub>18</sub> Cu <sub>2</sub> I <sub>2</sub> S <sub>4</sub> | C <sub>5</sub> H <sub>9</sub> Cu <sub>2</sub> I <sub>2</sub> S <sub>2</sub> |
| Formula weight                                      | 647.36                                                                        | 514.12                                                                      |
| Temperature/K                                       | 100.0                                                                         | 100.0                                                                       |
| Wavelength/Å                                        | 0.71073                                                                       | 0.71073                                                                     |
| Crystal system                                      | triclinic                                                                     | triclinic                                                                   |
| Space group                                         | P-1                                                                           | P-1                                                                         |
| <i>a</i> /Å                                         | 6.0654(2)                                                                     | 6.6244(19)                                                                  |
| <i>b</i> /Å                                         | 8.2884(3)                                                                     | 7.837(3)                                                                    |
| <i>c</i> /Å                                         | 8.4381(3)                                                                     | 11.230(4)                                                                   |
| $\alpha$ /°                                         | 88.411(2)                                                                     | 83.032(11)                                                                  |
| $\beta$ /°                                          | 87.976(2)                                                                     | 73.216(10)                                                                  |
| $\gamma$ /°                                         | 86.729(2)                                                                     | 75.644(12)                                                                  |
| Volume/ Å <sup>3</sup>                              | 423.11(3)                                                                     | 540.0(3)                                                                    |
| <i>Z</i>                                            | 1                                                                             | 2                                                                           |
| Density (calc.) g/cm <sup>3</sup>                   | 2.541                                                                         | 3.162                                                                       |
| Absorption coefficient/mm <sup>-1</sup>             | 6.635                                                                         | 9.981                                                                       |
| <i>F</i> (000)                                      | 306.0                                                                         | 470.0                                                                       |
| Crystal size/mm <sup>3</sup>                        | 0.114 × 0.062 × 0.059                                                         | 0.416 × 0.075 × 0.065                                                       |
| 2 $\theta$ range for data collection/°              | 4.832 to 56.984                                                               | 3.794 to 52.01                                                              |
| Index ranges                                        | -8 ≤ <i>h</i> ≤ 8,<br>-11 ≤ <i>k</i> ≤ 11,<br>-11 ≤ <i>l</i> ≤ 11             | 7 ≤ <i>h</i> ≤ 8,<br>-9 ≤ <i>k</i> ≤ 9,<br>-13 ≤ <i>l</i> ≤ 13              |
| Reflections collected                               | 14022                                                                         | 2113                                                                        |
| Independent reflections                             | 2144 [R <sub>int</sub> = 0.0465]                                              | 2113 [R <sub>int</sub> = ?]                                                 |
| Refinement method                                   | Full-matrix least-squares on <i>F</i> <sup>2</sup>                            | Full-matrix least-squares on <i>F</i> <sup>2</sup>                          |
| Data / restraints / parameters                      | 2144/0/82                                                                     | 2113/0/101                                                                  |
| Goodness-of-fit on <i>F</i> <sup>2</sup>            | 1.108                                                                         | 1.085                                                                       |
| Final <i>R</i> indices [ <i>I</i> > 2σ( <i>I</i> )] | R <sub>1</sub> = 0.0257,<br>wR <sub>2</sub> = 0.0559                          | R <sub>1</sub> = 0.0269,<br>wR <sub>2</sub> = 0.0753                        |
| <i>R</i> indices (all data)                         | R <sub>1</sub> = 0.0328,<br>wR <sub>2</sub> = 0.0592                          | R <sub>1</sub> = 0.0285,<br>wR <sub>2</sub> = 0.0767                        |
| Largest diff. peak and hole/e. Å <sup>-3</sup>      | 0.96/-0.81                                                                    | 1.88/-0.82                                                                  |



**Table S3.** Crystal Data, Data Collection and Structure Refinement for **CP4** and **CP5**.

| Compound                                                     | CP4                                                                            | CP5                                                                            |
|--------------------------------------------------------------|--------------------------------------------------------------------------------|--------------------------------------------------------------------------------|
| Formula                                                      | C <sub>15</sub> H <sub>27</sub> Br <sub>2</sub> Cu <sub>2</sub> S <sub>6</sub> | C <sub>10</sub> H <sub>18</sub> Br <sub>2</sub> Cu <sub>2</sub> S <sub>4</sub> |
| Formula weight                                               | 686.62                                                                         | 553.38                                                                         |
| Temperature/K                                                | 100.0                                                                          | 100.0                                                                          |
| Wavelength/Å                                                 | 0.71073                                                                        | 0.71073                                                                        |
| Crystal system                                               | monoclinic                                                                     | monoclinic                                                                     |
| Space group                                                  | P2 <sub>1</sub> /c                                                             | P2 <sub>1</sub> /c                                                             |
| <i>a</i> /Å                                                  | 12.9413(15)                                                                    | 8.1301(12)                                                                     |
| <i>b</i> /Å                                                  | 13.0872(11)                                                                    | 13.8417(14)                                                                    |
| <i>c</i> /Å                                                  | 14.5879(17)                                                                    | 14.591(2)                                                                      |
| $\alpha$ /°                                                  | 90                                                                             | 90                                                                             |
| $\beta$ /°                                                   | 115.754(5)                                                                     | 95.315(7)                                                                      |
| $\gamma$ /°                                                  | 90                                                                             | 90                                                                             |
| Volume/ Å <sup>3</sup>                                       | 2225.3(4)                                                                      | 1634.9(4)                                                                      |
| <i>Z</i>                                                     | 4                                                                              | 4                                                                              |
| Density (calc.) g/cm <sup>3</sup>                            | 2.049                                                                          | 2.248                                                                          |
| Absorption coefficient/mm <sup>-1</sup>                      | 6.065                                                                          | 7.979                                                                          |
| <i>F</i> (000)                                               | 1364.0                                                                         | 1080.0                                                                         |
| Crystal size/mm <sup>3</sup>                                 | 0.294 × 0.125 × 0.043                                                          | 0.133 × 0.084 × 0.034                                                          |
| 2 $\theta$ range for data collection/°                       | 4.392 to 61.136                                                                | 5.608 to 64.994                                                                |
| Index ranges                                                 | 18 ≤ <i>h</i> ≤ 18,<br>-18 ≤ <i>k</i> ≤ 15,<br>-20 ≤ <i>l</i> ≤ 20             | -12 ≤ <i>h</i> ≤ 12,<br>-20 ≤ <i>k</i> ≤ 20,<br>-22 ≤ <i>l</i> ≤ 22            |
| Reflections collected                                        | 47344                                                                          | 62361                                                                          |
| Independent reflections                                      | 6754 [R <sub>int</sub> = 0.0547]                                               | 5923 [R <sub>int</sub> = 0.0370]                                               |
| Refinement method                                            | Full-matrix least-squares on <i>F</i> <sup>2</sup>                             | Full-matrix least-squares on <i>F</i> <sup>2</sup>                             |
| Data / restraints / parameters                               | 6754/0/226                                                                     | 5923/0/163                                                                     |
| Goodness-of-fit on <i>F</i> <sup>2</sup>                     | 1.047                                                                          | 1.088                                                                          |
| Final <i>R</i> indices [ <i>I</i> > 2 $\sigma$ ( <i>I</i> )] | R <sub>1</sub> = 0.0346, wR <sub>2</sub> = 0.0596                              | R <sub>1</sub> = 0.0303, wR <sub>2</sub> = 0.0721                              |
| <i>R</i> indices (all data)                                  | R <sub>1</sub> = 0.0543, wR <sub>2</sub> = 0.0665                              | R <sub>1</sub> = 0.0351, wR <sub>2</sub> = 0.0740                              |
| Largest diff. peak and hole/e. Å <sup>-3</sup>               | 0.81/-0.81                                                                     | 1.57/-1.09                                                                     |

**Table S4.** Crystal Data, Data Collection and Structure Refinement for **CP6** at 100K and 200K.

| Compound                                                     | CP6                                                                                           | CP6                                                                                           |
|--------------------------------------------------------------|-----------------------------------------------------------------------------------------------|-----------------------------------------------------------------------------------------------|
| Formula                                                      | C <sub>24</sub> H <sub>42</sub> Br <sub>6</sub> Cu <sub>6</sub> N <sub>2</sub> S <sub>8</sub> | C <sub>24</sub> H <sub>42</sub> Br <sub>6</sub> Cu <sub>6</sub> N <sub>2</sub> S <sub>8</sub> |
| Formula weight                                               | 1475.77                                                                                       | 1475.77                                                                                       |
| Temperature/K                                                | 100.0                                                                                         | 200K                                                                                          |
| Wavelength/Å                                                 | 0.71073                                                                                       | 0.71073                                                                                       |
| Crystal system                                               | triclinic                                                                                     | triclinic                                                                                     |
| Space group                                                  | P-1                                                                                           | P-1                                                                                           |
| <i>a</i> /Å                                                  | 7.8786(4)                                                                                     | 7.8928(11)                                                                                    |
| <i>b</i> /Å                                                  | 9.8046(5)                                                                                     | 9.8456(14)                                                                                    |
| <i>c</i> /Å                                                  | 26.8573(15)                                                                                   | 26.928(4)                                                                                     |
| $\alpha$ /°                                                  | 87.562(2)                                                                                     | 87.555(2)                                                                                     |
| $\beta$ /°                                                   | 83.924(2)                                                                                     | 84.017(2)                                                                                     |
| $\gamma$ /°                                                  | 87.249(2)                                                                                     | 87.229(2)                                                                                     |
| Volume/ Å <sup>3</sup>                                       | 2059.14(19)                                                                                   | 2077.2(5)                                                                                     |
| <i>Z</i>                                                     | 2                                                                                             | 2                                                                                             |
| Density (calc.) g/cm <sup>3</sup>                            | 2.380                                                                                         | 2.359                                                                                         |
| Absorption coefficient/mm <sup>-1</sup>                      | 9.293                                                                                         | 9.212                                                                                         |
| <i>F</i> (000)                                               | 1424.0                                                                                        | 1424.0                                                                                        |
| Crystal size/mm <sup>3</sup>                                 | 0.163 × 0.107 × 0.043                                                                         | 0.163 × 0.107 × 0.043                                                                         |
| 2 $\theta$ range for data collection/°                       | 4.162 to 72.658                                                                               | 4.144 to 67.504                                                                               |
| Index ranges                                                 | -13 ≤ <i>h</i> ≤ 13,<br>-16 ≤ <i>k</i> ≤ 16,<br>0 ≤ <i>l</i> ≤ 44                             | -12 ≤ <i>h</i> ≤ 12,<br>-15 ≤ <i>k</i> ≤ 15,<br>0 ≤ <i>l</i> ≤ 42                             |
| Reflections collected                                        | 19959                                                                                         | 16608                                                                                         |
| Independent reflections                                      | 19959 [R <sub>int</sub> = 0.0504]                                                             | 16608 [R <sub>int</sub> = 0.0501]                                                             |
| Refinement method                                            | Full-matrix least-squares on <i>F</i> <sup>2</sup>                                            | Full-matrix least-squares on <i>F</i> <sup>2</sup>                                            |
| Data / restraints / parameters                               | 19959/0/417                                                                                   | 16608/0/417                                                                                   |
| Goodness-of-fit on <i>F</i> <sup>2</sup>                     | 1.021                                                                                         | 1.000                                                                                         |
| Final <i>R</i> indices [ <i>I</i> > 2 $\sigma$ ( <i>I</i> )] | R <sub>1</sub> = 0.0279, wR <sub>2</sub> = 0.0686                                             | R <sub>1</sub> = 0.0276, wR <sub>2</sub> = 0.0683                                             |
| <i>R</i> indices (all data)                                  | R <sub>1</sub> = 0.0356, wR <sub>2</sub> = 0.0714                                             | R <sub>1</sub> = 0.0369, wR <sub>2</sub> = 0.0715                                             |
| Largest diff. peak and hole/e. Å <sup>-3</sup>               | 0.83/-1.91                                                                                    | 1.36/-1.57                                                                                    |

**Table S5.** Crystal Data, Data Collection and Structure Refinement for **CP7** and **CP8**.

| Compound                                            | CP7                                                             | CP8                                                                 |
|-----------------------------------------------------|-----------------------------------------------------------------|---------------------------------------------------------------------|
| Formula                                             | C <sub>5</sub> H <sub>9</sub> ClCuS <sub>2</sub>                | C <sub>10</sub> H <sub>18</sub> HgI <sub>2</sub> S <sub>4</sub>     |
| Formula weight                                      | 232.23                                                          | 720.87                                                              |
| Temperature/K                                       | 100.0                                                           | 100.0                                                               |
| Wavelength/Å                                        | 0.71073                                                         | 0.71073                                                             |
| Crystal system                                      | monoclinic                                                      | triclinic                                                           |
| Space group                                         | C2/m                                                            | P-1                                                                 |
| <i>a</i> /Å                                         | 18.3202(9)                                                      | 9.3903(3)                                                           |
| <i>b</i> /Å                                         | 6.7228(3)                                                       | 9.8817(3)                                                           |
| <i>c</i> /Å                                         | 6.1576(3)                                                       | 10.0545(3)                                                          |
| $\alpha$ /°                                         | 90                                                              | 68.8700(10)                                                         |
| $\beta$ /°                                          | 100.814(2)                                                      | 79.6750(10)                                                         |
| $\gamma$ /°                                         | 90                                                              | 86.6570(10)                                                         |
| Volume/ Å <sup>3</sup>                              | 744.92(6)                                                       | 856.14(5)                                                           |
| <i>Z</i>                                            | 4                                                               | 2                                                                   |
| Density (calc.) g/cm <sup>3</sup>                   | 2.071                                                           | 2.796                                                               |
| Absorption coefficient/mm <sup>-1</sup>             | 3.751                                                           | 13.062                                                              |
| <i>F</i> (000)                                      | 468.0                                                           | 656.0                                                               |
| Crystal size/mm <sup>3</sup>                        | 0.232 × 0.172 × 0.035                                           | 0.459 × 0.254 × 0.174                                               |
| 2θ range for data collection/°                      | 4.528 to 61.046                                                 | 4.408 to 61.156                                                     |
| Index ranges                                        | -26 ≤ <i>h</i> ≤ 26,<br>-9 ≤ <i>k</i> ≤ 9,<br>-8 ≤ <i>l</i> ≤ 8 | -13 ≤ <i>h</i> ≤ 13,<br>-14 ≤ <i>k</i> ≤ 13,<br>-14 ≤ <i>l</i> ≤ 13 |
| Reflections collected                               | 12880                                                           | 14810                                                               |
| Independent reflections                             | 1227 [R <sub>int</sub> = 0.0375]                                | 5243 [R <sub>int</sub> = 0.0289]                                    |
| Refinement method                                   | Full-matrix least-squares on <i>F</i> <sup>2</sup>              | Full-matrix least-squares on <i>F</i> <sup>2</sup>                  |
| Data / restraints / parameters                      | 1227/0/49                                                       | 5243/0/155                                                          |
| Goodness-of-fit on <i>F</i> <sup>2</sup>            | 1.426                                                           | 1.189                                                               |
| Final <i>R</i> indices [ <i>I</i> > 2σ( <i>I</i> )] | R <sub>1</sub> = 0.0348, wR <sub>2</sub> = 0.0858               | R <sub>1</sub> = 0.0242, wR <sub>2</sub> = 0.0590                   |
| <i>R</i> indices (all data)                         | R <sub>1</sub> = 0.0387, wR <sub>2</sub> = 0.0871               | R <sub>1</sub> = 0.0244, wR <sub>2</sub> = 0.0591                   |
| Largest diff. peak and hole/e. Å <sup>-3</sup>      | 1.64/-0.70                                                      | 3.11/-2.46                                                          |

**Table S6.** Crystal Data, Data Collection and Structure Refinement for **CP9** and **CP10**.

| Compound                                                     | <b>CP9</b>                                                        | <b>CP10</b>                                                         |
|--------------------------------------------------------------|-------------------------------------------------------------------|---------------------------------------------------------------------|
| Formula                                                      | C <sub>10</sub> H <sub>18</sub> Br <sub>2</sub> HgS <sub>4</sub>  | C <sub>5</sub> H <sub>9</sub> Br <sub>2</sub> HgS <sub>2</sub>      |
| Formula weight                                               | 626.89                                                            | 493.65                                                              |
| Temperature/K                                                | 100.0                                                             | 100.0                                                               |
| Wavelength/Å                                                 | 0.71073                                                           | 0.71073                                                             |
| Crystal system                                               | orthorhombic                                                      | monoclinic                                                          |
| Space group                                                  | Pna2 <sub>1</sub>                                                 | C2/c                                                                |
| <i>a</i> /Å                                                  | 18.1737(10)                                                       | 8.2012(3)                                                           |
| <i>b</i> /Å                                                  | 4.5256(2)                                                         | 13.2979(5)                                                          |
| <i>c</i> /Å                                                  | 19.0929(10)                                                       | 18.6993(7)                                                          |
| $\alpha$ /°                                                  | 90                                                                | 90                                                                  |
| $\beta$ /°                                                   | 90                                                                | 93.1840(10)                                                         |
| $\gamma$ /°                                                  | 90                                                                | 90                                                                  |
| Volume/ Å <sup>3</sup>                                       | 1570.33(14)                                                       | 2036.17(13)                                                         |
| <i>Z</i>                                                     | 4                                                                 | 8                                                                   |
| Density (calc.) g/cm <sup>3</sup>                            | 2.652                                                             | 3.221                                                               |
| Absorption coefficient/mm <sup>-1</sup>                      | 15.399                                                            | 23.309                                                              |
| <i>F</i> (000)                                               | 1168.0                                                            | 1768.0                                                              |
| Crystal size/mm <sup>3</sup>                                 | 0.217 × 0.105 × 0.034                                             | 0.25 × 0.079 × 0.074                                                |
| 2 $\theta$ range for data collection/°                       | 4.266 to 54.996                                                   | 5.842 to 61.08                                                      |
| Index ranges                                                 | -23 ≤ <i>h</i> ≤ 23,<br>-5 ≤ <i>k</i> ≤ 5,<br>-24 ≤ <i>l</i> ≤ 24 | -11 ≤ <i>h</i> ≤ 11,<br>-18 ≤ <i>k</i> ≤ 19,<br>-26 ≤ <i>l</i> ≤ 26 |
| Reflections collected                                        | 53635                                                             | 30365                                                               |
| Independent reflections                                      | 3609 [R <sub>int</sub> = 0.0639]                                  | 3110 [R <sub>int</sub> = 0.0563]                                    |
| Refinement method                                            | Full-matrix least-squares on <i>F</i> <sup>2</sup>                | Full-matrix least-squares on <i>F</i> <sup>2</sup>                  |
| Data / restraints / parameters                               | 3609/1/159                                                        | 3110/0/91                                                           |
| Goodness-of-fit on <i>F</i> <sup>2</sup>                     | 1.066                                                             | 1.096                                                               |
| Final <i>R</i> indices [ <i>I</i> > 2 $\sigma$ ( <i>I</i> )] | R <sub>1</sub> = 0.0182, wR <sub>2</sub> = 0.0441                 | R <sub>1</sub> = 0.0214, wR <sub>2</sub> = 0.0614                   |
| <i>R</i> indices (all data)                                  | R <sub>1</sub> = 0.0204, wR <sub>2</sub> = 0.0451                 | R <sub>1</sub> = 0.0231, wR <sub>2</sub> = 0.0621                   |
| Largest diff. peak and hole/e. Å <sup>-3</sup>               | 0.63/-0.53                                                        | 1.58/-1.94                                                          |

**Table S7.** Crystal Data, Data Collection and Structure Refinement for **CP11** and **CP13**.

| Compound                                                     | <b>CP11</b>                                                                    | <b>CP13</b>                                                                     |
|--------------------------------------------------------------|--------------------------------------------------------------------------------|---------------------------------------------------------------------------------|
| Formula                                                      | C <sub>10</sub> H <sub>20</sub> Br <sub>4</sub> Hg <sub>2</sub> S <sub>4</sub> | C <sub>9</sub> H <sub>15</sub> CuHgI <sub>3</sub> N <sub>2</sub> S <sub>2</sub> |
| Formula weight                                               | 989.32                                                                         | 860.18                                                                          |
| Temperature/K                                                | 100.0                                                                          | 100.00                                                                          |
| Wavelength/Å                                                 | 0.71073                                                                        | 0.71073                                                                         |
| Crystal system                                               | orthorhombic                                                                   | triclinic                                                                       |
| Space group                                                  | Ama2                                                                           | P-1                                                                             |
| <i>a</i> /Å                                                  | 14.1565(12)                                                                    | 8.3763(8)                                                                       |
| <i>b</i> /Å                                                  | 15.7413(13)                                                                    | 9.3131(8)                                                                       |
| <i>c</i> /Å                                                  | 4.5260(3)                                                                      | 14.2531(9)                                                                      |
| $\alpha$ /°                                                  | 90                                                                             | 94.414(4)                                                                       |
| $\beta$ /°                                                   | 90                                                                             | 102.209(4)                                                                      |
| $\gamma$ /°                                                  | 90                                                                             | 113.075(4)                                                                      |
| Volume/ Å <sup>3</sup>                                       | 1008.58(14)                                                                    | 983.86(14)                                                                      |
| <i>Z</i>                                                     | 2                                                                              | 2                                                                               |
| Density (calc.) g/cm <sup>3</sup>                            | 3.258                                                                          | 2.904                                                                           |
| Absorption coefficient/mm <sup>-1</sup>                      | 23.529                                                                         | 13.780                                                                          |
| <i>F</i> (000)                                               | 888.0                                                                          | 766.0                                                                           |
| Crystal size/mm <sup>3</sup>                                 | 0.128 × 0.122 × 0.046                                                          | 0.287 × 0.098 × 0.096                                                           |
| 2 $\theta$ range for data collection/°                       | 5.756 to 66.326                                                                | 5.202 to 64.998                                                                 |
| Index ranges                                                 | -21 ≤ <i>h</i> ≤ 21,<br>-24 ≤ <i>k</i> ≤ 24,<br>-6 ≤ <i>l</i> ≤ 6              | -12 ≤ <i>h</i> ≤ 12,<br>-14 ≤ <i>k</i> ≤ 14,<br>-21 ≤ <i>l</i> ≤ 21             |
| Reflections collected                                        | 8550                                                                           | 185883                                                                          |
| Independent reflections                                      | 1968 [R <sub>int</sub> = 0.0341]                                               | 7116 [R <sub>int</sub> = 0.0381]                                                |
| Refinement method                                            | Full-matrix least-squares on <i>F</i> <sup>2</sup>                             | Full-matrix least-squares on <i>F</i> <sup>2</sup>                              |
| Data / restraints / parameters                               | 1968/1/51                                                                      | 7116/0/165                                                                      |
| Goodness-of-fit on <i>F</i> <sup>2</sup>                     | 0.969                                                                          | 1.116                                                                           |
| Final <i>R</i> indices [ <i>I</i> > 2 $\sigma$ ( <i>I</i> )] | R <sub>1</sub> = 0.0176, wR <sub>2</sub> = 0.0385                              | R <sub>1</sub> = 0.0204, wR <sub>2</sub> = 0.0543                               |
| <i>R</i> indices (all data)                                  | R <sub>1</sub> = 0.0196, wR <sub>2</sub> = 0.0397                              | R <sub>1</sub> = 0.0212, wR <sub>2</sub> = 0.0556                               |
| Largest diff. peak and hole/e. Å <sup>-3</sup>               | 1.00/-0.97                                                                     | 2.80/-2.03                                                                      |



**Table S8.** Crystal Data, Data Collection and Structure Refinement for **CP14** and **CP15**.

| Compound                                                     | <b>CP14</b>                                                                                                  | <b>CP15</b>                                                          |
|--------------------------------------------------------------|--------------------------------------------------------------------------------------------------------------|----------------------------------------------------------------------|
| Formula                                                      | C <sub>22</sub> H <sub>38</sub> Cu <sub>2</sub> Hg <sub>2</sub> I <sub>6</sub> N <sub>4</sub> S <sub>4</sub> | C <sub>17</sub> H <sub>30</sub> Br <sub>2</sub> CuHgINS <sub>6</sub> |
| Formula weight                                               | 1776.46                                                                                                      | 991.86                                                               |
| Temperature/K                                                | 100.0                                                                                                        | 100.00                                                               |
| Wavelength/Å                                                 | 0.71073                                                                                                      | 0.71073                                                              |
| Crystal system                                               | triclinic                                                                                                    | triclinic                                                            |
| Space group                                                  | P-1                                                                                                          | P-1                                                                  |
| <i>a</i> /Å                                                  | 9.8483(8)                                                                                                    | 10.1654(12)                                                          |
| <i>b</i> /Å                                                  | 14.9259(16)                                                                                                  | 12.582(2)                                                            |
| <i>c</i> /Å                                                  | 15.2501(13)                                                                                                  | 13.033(2)                                                            |
| $\alpha$ /°                                                  | 108.914(3)                                                                                                   | 67.070(7)                                                            |
| $\beta$ /°                                                   | 95.043(5)                                                                                                    | 69.373(5)                                                            |
| $\gamma$ /°                                                  | 94.515(3)                                                                                                    | 76.469(6)                                                            |
| Volume/ Å <sup>3</sup>                                       | 2098.7(3)                                                                                                    | 1427.8(4)                                                            |
| <i>Z</i>                                                     | 2                                                                                                            | 2                                                                    |
| Density (calc.) g/cm <sup>3</sup>                            | 2.811                                                                                                        | 2.307                                                                |
| Absorption coefficient/mm <sup>-1</sup>                      | 12.924                                                                                                       | 10.439                                                               |
| <i>F</i> (000)                                               | 1596.0                                                                                                       | 934.0                                                                |
| Crystal size/mm <sup>3</sup>                                 | 0.199 × 0.169 × 0.142                                                                                        | 0.199 × 0.072 × 0.041                                                |
| 2 $\theta$ range for data collection/°                       | 4.694 to 64.998                                                                                              | 4.716 to 61.124                                                      |
| Index ranges                                                 | -14 ≤ <i>h</i> ≤ 14,<br>-22 ≤ <i>k</i> ≤ 22,<br>-23 ≤ <i>l</i> ≤ 23                                          | -13 ≤ <i>h</i> ≤ 14,<br>-17 ≤ <i>k</i> ≤ 17,<br>-18 ≤ <i>l</i> ≤ 18  |
| Reflections collected                                        | 732333                                                                                                       | 38896                                                                |
| Independent reflections                                      | 15174 [R <sub>int</sub> = 0.0705]                                                                            | 8594 [R <sub>int</sub> = 0.0318]                                     |
| Refinement method                                            | Full-matrix least-squares on <i>F</i> <sup>2</sup>                                                           | Full-matrix least-squares on <i>F</i> <sup>2</sup>                   |
| Data / restraints / parameters                               | 15174/0/452                                                                                                  | 8594/0/284                                                           |
| Goodness-of-fit on <i>F</i> <sup>2</sup>                     | 1.115                                                                                                        | 1.098                                                                |
| Final <i>R</i> indices [ <i>I</i> > 2 $\sigma$ ( <i>I</i> )] | R <sub>1</sub> = 0.0153, wR <sub>2</sub> = 0.0366                                                            | R <sub>1</sub> = 0.0229, wR <sub>2</sub> = 0.0354                    |
| <i>R</i> indices (all data)                                  | R <sub>1</sub> = 0.0160, wR <sub>2</sub> = 0.0370                                                            | R <sub>1</sub> = 0.0316, wR <sub>2</sub> = 0.0377                    |
| Largest diff. peak and hole/e. Å <sup>-3</sup>               | 1.20/-1.43                                                                                                   | 0.80/-0.93                                                           |

**Table S9.** Crystal Data, Data Collection and Structure Refinement for **D1** and **M1**.

| Compound                                                     | <b>D1</b>                                                                     | <b>M1</b>                                                         |
|--------------------------------------------------------------|-------------------------------------------------------------------------------|-------------------------------------------------------------------|
| Formula                                                      | C <sub>10</sub> H <sub>20</sub> Hg <sub>2</sub> I <sub>4</sub> S <sub>2</sub> | C <sub>10</sub> H <sub>20</sub> Br <sub>2</sub> HgS <sub>4</sub>  |
| Formula weight                                               | 1177.28                                                                       | 628.91                                                            |
| Temperature/K                                                | 100.0                                                                         | 100.0                                                             |
| Wavelength/Å                                                 | 0.71073                                                                       | 0.71073                                                           |
| Crystal system                                               | monoclinic                                                                    | orthorhombic                                                      |
| Space group                                                  | P2 <sub>1</sub> /n                                                            | P2 <sub>1</sub> 2 <sub>1</sub> 2                                  |
| <i>a</i> /Å                                                  | 9.7802(8)                                                                     | 8.2203(3)                                                         |
| <i>b</i> /Å                                                  | 10.0351(10)                                                                   | 22.7657(9)                                                        |
| <i>c</i> /Å                                                  | 11.6340(10)                                                                   | 4.4494(2)                                                         |
| $\alpha$ /°                                                  | 90                                                                            | 90                                                                |
| $\beta$ /°                                                   | 90.652(3)                                                                     | 90                                                                |
| $\gamma$ /°                                                  | 90                                                                            | 90                                                                |
| Volume/ Å <sup>3</sup>                                       | 1141.75(18)                                                                   | 832.66(6)                                                         |
| <i>Z</i>                                                     | 2                                                                             | 2                                                                 |
| Density (calc.) g/cm <sup>3</sup>                            | 3.424                                                                         | 2.508                                                             |
| Absorption coefficient/mm <sup>-1</sup>                      | 19.194                                                                        | 14.521                                                            |
| <i>F</i> (000)                                               | 1032.0                                                                        | 588.0                                                             |
| Crystal size/mm <sup>3</sup>                                 | 0.308 × 0.157 × 0.134                                                         | 0.332 × 0.044 × 0.037                                             |
| 2 $\theta$ range for data collection/°                       | 5.472 to 58                                                                   | 6.114 to 55.962                                                   |
| Index ranges                                                 | -13 ≤ <i>h</i> ≤ 13,<br>-13 ≤ <i>k</i> ≤ 13,<br>-15 ≤ <i>l</i> ≤ 15           | -10 ≤ <i>h</i> ≤ 10,<br>-30 ≤ <i>k</i> ≤ 30,<br>-5 ≤ <i>l</i> ≤ 5 |
| Reflections collected                                        | 50811                                                                         | 18946                                                             |
| Independent reflections                                      | 3029 [R <sub>int</sub> = 0.0528]                                              | 2004 [R <sub>int</sub> = 0.0500]                                  |
| Refinement method                                            | Full-matrix least-squares on <i>F</i> <sup>2</sup>                            | Full-matrix least-squares on <i>F</i> <sup>2</sup>                |
| Data / restraints / parameters                               | 3029/0/93                                                                     | 2004/0/85                                                         |
| Goodness-of-fit on <i>F</i> <sup>2</sup>                     | 1.187                                                                         | 1.139                                                             |
| Final <i>R</i> indices [ <i>I</i> > 2 $\sigma$ ( <i>I</i> )] | R <sub>1</sub> = 0.0202, wR <sub>2</sub> = 0.0462                             | R <sub>1</sub> = 0.0192, wR <sub>2</sub> = 0.0326                 |
| <i>R</i> indices (all data)                                  | R <sub>1</sub> = 0.0203, wR <sub>2</sub> = 0.0463                             | R <sub>1</sub> = 0.0213, wR <sub>2</sub> = 0.0334                 |
| Largest diff. peak and hole/e. Å <sup>-3</sup>               | 1.73/-2.73                                                                    | 0.76/-0.92                                                        |

**Table S10.** Hydrogen bond geometry (Å, °) in **CP6**.

| <i>D</i> —H··· <i>A</i>     | <i>D</i> —H | H··· <i>A</i> | <i>D</i> ··· <i>A</i> | <i>D</i> —H··· <i>A</i> |
|-----------------------------|-------------|---------------|-----------------------|-------------------------|
| C3—H3A···S7 <sup>1</sup>    | 0.99        | 3.05          | 3.698(4)              | 124.2                   |
| C7—H7···Br3 <sup>2</sup>    | 1.00        | 2.70          | 3.649(4)              | 157.8                   |
| C8—H8B···Br2 <sup>2</sup>   | 0.99        | 2.86          | 3.598(4)              | 132.4                   |
| C9—H9A···Br2 <sup>3</sup>   | 0.99        | 3.05          | 3.695(4)              | 124.2                   |
| C17—H17···Br6 <sup>4</sup>  | 1.00        | 2.72          | 3.678(4)              | 161.2                   |
| C18—H18A···N1 <sup>5</sup>  | 0.99        | 2.85          | 3.679(6)              | 141.2                   |
| C20—H20B···Br1 <sup>6</sup> | 0.99        | 2.95          | 3.679(4)              | 131.3                   |
| C22—H22B···Br1 <sup>4</sup> | 0.98        | 2.85          | 3.692(5)              | 144.2                   |
| C22—H22C···Br5 <sup>6</sup> | 0.98        | 2.94          | 3.621(5)              | 127.2                   |

Symmetry codes: <sup>1</sup>1+X,-1+Y,+Z; <sup>2</sup>1+X,+Y,+Z; <sup>3</sup>1-X,-Y,1-Z; <sup>4</sup>-1+X,+Y,+Z; <sup>5</sup>+X,1+Y,+Z; <sup>6</sup>1-X,1-Y,2-Z

**Table S11.** Hydrogen bond geometry (Å, °) in **CP11**.

| <i>D</i> —H··· <i>A</i>   | <i>D</i> —H | H··· <i>A</i> | <i>D</i> ··· <i>A</i> | <i>D</i> —H··· <i>A</i> |
|---------------------------|-------------|---------------|-----------------------|-------------------------|
| C1—H1B···Br1 <sup>1</sup> | 0.99        | 3.10          | 3.758(4)              | 124.7                   |
| C1—H1B···Br1 <sup>2</sup> | 0.99        | 2.87          | 3.667(4)              | 138.3                   |
